# Supplementary material for: Geographical and population disparities in timely access to prehospital and advanced level emergency care in New Zealand: a cross-sectional study
Source: PubMed Central journal article supplement — BMJ Open. 2019 Jul 26;9(7):e026026. doi: 10.1136/bmjopen-2018-026026 (PMC6661642; doi:10.1136/bmjopen-2018-026026), 2019-07-26
Supplement: bmjopen-2018-026026.draft_revisions.pdf [file bmjopen-2018-026026.draft_revisions.pdf]

# BMJ Open

BMJ Open is committed to open peer review. As part of this commitment we make the peer review history of every article we publish publicly available.

When an article is published we post the peer reviewers' comments and the authors' responses online. We also post the versions of the paper that were used during peer review. These are the versions that the peer review comments apply to.

The versions of the paper that follow are the versions that were submitted during the peer review process. They are not the versions of record or the final published versions. They should not be cited or distributed as the published version of this manuscript.

BMJ Open is an open access journal and the full, final, typeset and author-corrected version of record of the manuscript is available on our site with no access controls, subscription charges or pay-per-view fees (<http://bmjopen.bmj.com>).

If you have any questions on BMJ Open's open peer review process please email [info.bmjopen@bmj.com](mailto:info.bmjopen@bmj.com)

# BMJ Open

## A geospatial analysis of geographical and population disparities in timely access to prehospital and advanced level emergency care in New Zealand

|                               |                                                                                                                                                                                                                                                                                                                                                                                                                                                                                                                                                                                                                                                                                                                          |
|-------------------------------|--------------------------------------------------------------------------------------------------------------------------------------------------------------------------------------------------------------------------------------------------------------------------------------------------------------------------------------------------------------------------------------------------------------------------------------------------------------------------------------------------------------------------------------------------------------------------------------------------------------------------------------------------------------------------------------------------------------------------|
| Journal:                      | <i>BMJ Open</i>                                                                                                                                                                                                                                                                                                                                                                                                                                                                                                                                                                                                                                                                                                          |
| Manuscript ID                 | bmjopen-2018-026026                                                                                                                                                                                                                                                                                                                                                                                                                                                                                                                                                                                                                                                                                                      |
| Article Type:                 | Research                                                                                                                                                                                                                                                                                                                                                                                                                                                                                                                                                                                                                                                                                                                 |
| Date Submitted by the Author: | 14-Aug-2018                                                                                                                                                                                                                                                                                                                                                                                                                                                                                                                                                                                                                                                                                                              |
| Complete List of Authors:     | Lilley, Rebecca; University of Otago , Department of Preventive and Social Medicine<br>de Graaf, Brandon; University of Otago , Department of Preventive and Social Medicine<br>Kool, Bridget; University of Auckland, Section of Epidemiology and Biosatistics<br>Davie, Gabrielle; University of Otago, Department of Preventive and Social Medicine<br>Reid, Papaarangi; University of Auckland, Te Kupenga Hauora Māori<br>Dicker, Bridget; St John<br>Civil, Ian; University of Auckland, Surgery; Auckland City Hospital, Trauma and Vascular Surgeon<br>Ameratunga, Shanthi; University of Auckland, Section of Epidemiology and Biosatistics<br>Branas, Charles; Columbia University, Department of Epidemiology |
| Keywords:                     | geospatial analysis, PUBLIC HEALTH, Organisation of health services < HEALTH SERVICES ADMINISTRATION & MANAGEMENT, access to services, ACCIDENT & EMERGENCY MEDICINE                                                                                                                                                                                                                                                                                                                                                                                                                                                                                                                                                     |
|                               |                                                                                                                                                                                                                                                                                                                                                                                                                                                                                                                                                                                                                                                                                                                          |

SCHOLARONE™  
Manuscripts

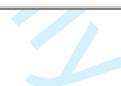

**Proposed paper title:** *A geospatial analysis of geographical and population disparities in timely access to prehospital and advanced level emergency care in New Zealand*

Short: Disparities in access to prehospital trauma and medical care in NZ

**Authors & Affiliations:** Lilley R<sup>1</sup>, de Graaf B<sup>1</sup>, Kool B<sup>2</sup>, Davie G<sup>1</sup>, Reid P<sup>3</sup>, Dicker B<sup>4,5</sup>, Civil I<sup>6</sup>, Ameratunga S<sup>2</sup>, Branas CC<sup>7</sup>

1 - Injury Prevention Research Unit, Department of Preventive and Social Medicine, Dunedin School of Medicine, University of Otago, New Zealand; 2 – Section of Epidemiology and Biostatistics, School of Population Health, University of Auckland, New Zealand; 3 - Te Kupenga Hauora Māori, Faculty of Medical and Health Sciences, University of Auckland, New Zealand; 4 Department of Paramedicine, Auckland University of Technology, Auckland, New Zealand; - 5 - St John, Mt Wellington, Auckland, New Zealand; 6 – Trauma Services, Auckland District Health Board, Auckland, New Zealand; 7 - Department of Epidemiology, Columbia University Mailman School of Public Health, New York, United States of America.

**Corresponding author & present address:** Dr Rebecca Lilley, Injury Prevention Research Unit, Department of Preventive and Social Medicine, Dunedin School of Medicine, University of Otago, P.O. Box 56, Dunedin 9054, New Zealand. rebecca.lilley@otago.ac.nz

**Author e-mail addresses:** rebecca.lilley@otago.ac.nz; brandon.degraaf@otago.ac.nz, b.kool@auckland.ac.nz, gabrielle.davie@otago.ac.nz; p.reid@auckland.ac.nz, IanC@adhb.govt.nz, Bridget.Dicker@stjohn.org.nz; s.ameratunga@auckland.ac.nz, c.branas@columbia.edu

Abstract word count 262; main body word count 3452; tables 3; figures 1 references 27

## ABSTRACT

**OBJECTIVE:** Rapid access to advanced emergency medical and trauma care has been shown to significantly reduce mortality and disability. This study aims to systematically examine geographical proximity and access to prehospital care provided by Emergency Medical Services (EMS) and advanced-level hospital care, for the smallest geographical units used in New Zealand and explores national disparities in geographical access to these services.

**DESIGN:** Observations study involving geospatial analysis of population access to EMS and advanced-level hospital care.

**SETTING:** Population access to advanced-level hospital care via road and air EMS across New Zealand.

**PARTICIPANTS:** New Zealand population usually resident within geographical Census meshblocks.

**PRIMARY AND SECONDARY OUTCOME MEASURES:** The proportion of the resident population with calculated EMS access to advanced-level hospital care within 60 minutes was examined by age, sex, ethnicity, level of deprivation, and population density to identify disparities in geographical access.

**RESULTS:** An estimated 16% of the New Zealand population does not have timely EMS access to advanced-level hospital care. The 700,000 New Zealanders without timely access lived mostly in areas of low-moderate population density. Indigenous Māori, New Zealand European and older New Zealanders were less likely to have timely access.

**CONCLUSIONS:** These findings suggest that in New Zealand, geographically marginalised groups which tend to be rural and remote communities with disproportionately more indigenous Māori and older adults have poorer EMS access to advanced-level hospitals. Addressing these inequities in rapid access to medical care may lead to improvements in survival that have been documented for people who experience medical or surgical emergencies.

**FUNDING:** Health Research Council of New Zealand (HRC 15/186)

1  
2  
3  
4  
5  
6  
7  
8  
9  
10  
11  
12  
13  
14  
15  
16  
17  
18  
19  
20  
21  
22  
23  
24  
25  
26  
27  
28  
29  
30  
31  
32  
33  
34  
35  
36  
37  
38  
39  
40  
41  
42  
43  
44  
45  
46  
47  
48  
49  
50  
51  
52  
53  
54  
55  
56  
57  
58  
59  
60

**KEY WORDS:** Emergency Medical Services; Geospatial; GIS; Hospital; Health Services  
Access; Time-to-treatment

For peer review only

## Article Summary

### Strengths and limitations of this study

This study is the first step in assessing access to emergency medical services (EMS) in New Zealand, a long, narrow and geographically challenging island nation in the South Pacific with a small, geographically dispersed population.

This study expands on previous international assessments of timely access to emergency hospital-level care by mapping exact locations of EMS response.

The choice of geospatial software and consciously conservative assumptions chosen made are likely to underestimate the impact the theoretical access estimates presented.

The EMS scenario theoretically modelled in our analysis fits a “scoop & run” strategy to prehospital care, and does not consider other prehospital strategies, such as a differentiated strategy, or rapid delivery of specialist medical expertise to the patient.

## INTRODUCTION

Globally, millions of people with life-threatening injuries or health events require rapid and timely access to advanced healthcare services to prevent needless mortality and morbidity. The public health burden of time-critical medical emergencies can be further exacerbated in countries with challenging terrain, long travel distances, and dispersed populations, despite relative economic standing and available resources. New Zealand is one country where these natural and population features are a daily challenge to the timely and equitable delivery of prehospital emergency care.

Death and disability due to acute medical emergencies can be significantly reduced by the timely provision of prehospital emergency healthcare, thereby presenting many opportunities for tertiary prevention. Optimal models of trauma care delivery, focusing on a continuum of timely emergency medical services (EMS) to efficient in-hospital care, start with the rapid provision of prehospital EMS, provide the best chance for survival and rehabilitation following injury.<sup>1-3</sup> A time sensitive approach has also been proven to benefit patients requiring EMS following cardiac, stroke and vascular events.<sup>4,5</sup>

EMS are a vital entry point into the continuum of acute emergency health care, as their primary role is to rapidly meet the emergency prehospital care needs of patients following time-critical injury or health events. In terms of receiving hospital-level treatment, the first hour, commonly referred to as the 'golden hour', is generally considered to be the most critical in terms of receiving definitive treatment for cases with time-critical injuries or health conditions.<sup>2</sup> Although not supported by a strong evidence-base, access to EMS and advanced-level hospital care is often judged against this threshold.<sup>6,7</sup> Disparities in timely access to advanced-level hospitals have been documented in numerous countries, identifying higher risk of delayed access for communities and vulnerable groups.<sup>6,8-11</sup>

New Zealand's mountainous terrain, long travel distances, and relatively small and geographically dispersed population of 4.2 million can severely hinder physical/transport access to advanced hospital-level care impacting timely and equitable delivery of prehospital EMS. New Zealand's population density is relatively low at 15 people per square kilometre, considerably less than countries with similar land area such as the United Kingdom with 243 people per square kilometre. Despite having low overall population density, New Zealand is highly urbanised, with 86% of the population living in urban areas.<sup>12</sup> Case reviews in New

1  
2  
3 Zealand suggest there are opportunities to improve prehospital EMS and reduce the number  
4 of prehospital deaths.<sup>13 14</sup>  
5

6  
7 This study systematically examines geographical proximity and access to prehospital care  
8 provided by EMS and advanced-level hospital care, for the smallest geographical units used  
9 in New Zealand, in order to identify opportunities to improve survivability and reduce  
10 disability following time-critical medical emergencies, and explores national disparities in  
11 geographical access to these services.  
12  
13  
14

## 15 **METHODS**

### 16 *Advanced level hospital care in New Zealand*

17  
18 There are three levels of classification for New Zealand hospitals, relating to their capability  
19 to provide the appropriate services for seriously injured or ill patients (Table 1). New Zealand  
20 has a unique system where by trauma response, treatment, and rehabilitation are funded by  
21 the universal, no-fault, publicly funded Accident Compensation Corporation (ACC). In  
22 contrast, medical response, treatment and rehabilitation is publicly funded by each individual  
23 District Health Board with some part-charges for ambulance services.  
24  
25  
26  
27  
28  
29

### 30 *Data sources*

31  
32 For this study we used Census 2013 (most recent publically available data) meshblock  
33 boundary and characteristics information available from Statistics New Zealand.<sup>15</sup>  
34 Meshblocks are the smallest geographical unit available. In the 2013 census there were  
35 45,989 meshblocks ranging in size from part of a city block containing approximately 110  
36 people to a large area of rural land containing approximately 60 people. In addition to the  
37 boundary shapefiles, we obtained sociodemographic, deprivation and urbanity characteristics  
38 of the population usually residing within each meshblock.<sup>15</sup>  
39  
40  
41  
42  
43  
44

45 The physical addresses of advanced-level (Level 1 and 2) hospitals were converted to  
46 geographical longitude-latitude coordinates. The locations of road ambulance stations as at  
47 2014/15 were obtained from the two providers of these services in New Zealand, St. John  
48 Ambulance (New Zealand's major provider serving 98% of the population) and Wellington  
49 Free Ambulance. Air EMS services were restricted to helicopter based services in use in 2016  
50 and their longitude-latitude coordinates were derived from multiple sources, including the  
51 Civil Aviation Authority, the Hawkes Bay Rescue Helicopter Trust, and Google Maps. Road  
52  
53  
54  
55  
56  
57  
58  
59  
60



1  
2  
3 network data was obtained from [www.geofabrik.de](http://www.geofabrik.de), an online open street map and spatial  
4 data provider.  
5

### 6 7 *Geospatial access calculations*

8  
9 Timely access was defined as the proportion of the population or land area from which an  
10 injured person was theoretically able to reach an advanced-level hospital within a given time  
11 (30, 45, 60, 90 and 120 minutes) via air and road EMS. Access was calculated using  
12 established geospatial methods previously described elsewhere.<sup>6 16</sup> The time required for the  
13 nearest air or road EMS to reach the geometric centroid of a meshblock, stabilise a patient,  
14 and then travel to the nearest advanced-level hospital was calculated for every meshblock.  
15  
16  
17  
18

19 Road network travel times included the following assumption obtained from St Johns:  
20 immediate response and average road ambulance time at scene 14 minutes and 49 seconds.  
21 All road calculations assumed ambulances drove at legal road speed, did not stop at  
22 intersections, driving conditions were ideal (i.e. no congestion), and ambulances drove the  
23 shortest route. Road ambulance drive times were calculated using the Open Source Routing  
24 Machine (OSRM available at [www.project-osrm.org](http://www.project-osrm.org)).  
25  
26  
27  
28

29  
30 Air EMS travel times assumed helicopters flew in straight lines at an operational speed of  
31 182 km/hour, response time (preparation for lift-off) of 8 minutes, on scene time of 27  
32 minutes and 28 seconds, plus 32 seconds to find a safe pick-up landing site.<sup>17</sup> Air EMS flight  
33 times were calculated using custom written Python code running inside QGIS software.  
34  
35  
36

### 37 38 *Sociodemographic variables*

39  
40 Demographic data on age, sex and ethnicity was obtained by summing the subtotal of each  
41 characteristic across all meshblocks, thus estimating the population of New Zealand at the  
42 time of the 2013 Census. Age was grouped into five categories: 0-14, 15-29, 30-44, 45-64  
43 and  $\geq 65$  years. The five categories of ethnicity used were: Māori (Indigenous population),  
44 Pacific, Asian, New Zealand European, and MELAA (Middle Eastern, Latin American,  
45 African) and Other. Census ethnicity data is not prioritised, with individuals able to record  
46 multiple ethnicities, therefore all ethnicities reported are counted resulting in totals greater  
47 than 100%.  
48  
49  
50  
51  
52

53  
54 Deprivation was derived using the 2013 New Zealand Deprivation Index (NZDep), which  
55 aggregates and ranks communication, income, employment, family support, qualifications,  
56  
57  
58  
59

1  
2  
3 home ownership, living space and transport within each meshblock area.(26) NZDep deciles  
4 were categorised into quintiles, with '1-2' representing the least deprived 20% and '9-10' the  
5 most deprived 20% of meshblocks in New Zealand. Population density within each  
6 meshblock area was calculated using number of usually resident people divided by  
7 meshblock area, grouped into three categories: high (20 to <200,000), medium (2 to <20) and  
8 low (0 to <2 persons per kilometre).  
9  
10  
11  
12

### 13 *Statistical analyses*

14  
15  
16 Our unit of analysis was the 2013 Census meshblock. The count of usually resident  
17 populations within each Census 2013 meshblock was summed across the country to obtain  
18 national denominators. The sociodemographic, deprivation and urbanity characteristics of the  
19 population unable to access advanced-level care within key times are described using row  
20 percentages.  
21  
22  
23

24 A map of New Zealand was created to provide a visual representation of the areas within  
25 New Zealand that cannot access advanced-level hospital care via air and road EMS within 60  
26 minutes.  
27  
28  
29

### 30 *Ethical Approval*

31  
32  
33 Ethical approval for the broader programme of research (24), of which this specific study is a  
34 part of, was obtained from the University of Auckland Human Participants Ethics Committee  
35 (ref 016179), National Coronial Information System (ref NZ007) and University of Otago  
36 Health and Disability Ethics Committee (ref OTA/90/02/008/AM05).  
37  
38  
39  
40  
41  
42  
43  
44  
45  
46  
47  
48  
49  
50  
51  
52  
53  
54  
55  
56  
57  
58  
59  
60

## RESULTS

Access to advanced-level hospital care by air or road EMS takes over 60 minutes for the majority (84%) of New Zealand's land area. While less than 16% of our land area allows emergency access within 60 minutes, a substantial majority (83%) of New Zealanders live within those areas which do have timely access to advanced hospital level care within 60 minutes (Table 2). Close to one quarter (24%) of New Zealanders are estimated to have access to advanced-level hospital care within 30 minutes and two thirds (66%) within 45 minutes, 13% of the population are estimated to take up to 30 minutes longer than the 'golden hour' (i.e. within 60-90 minutes), and 4% are estimated to take greater than 90 minutes to access to advanced level hospital care.

Population differences in timely access were observed by ethnicity and population density. Persons identifying with Pacific, Asian or MELAA ethnic groups have the best theoretical access to hospital level care, with only 1-2% residing in meshblocks greater than 90 minutes away from Level 1 or 2 hospital care. In contrast, those of Māori or New Zealand European ethnicity had the poorest level of access with 4% and 3% respectively living in meshblocks greater than 90 minutes away from advanced-level hospital care. With respect to population density, access was poorest for people usually residing in lower density areas meshblocks, with 27% of people usually resident in low density areas versus 2% of people usually resident in high density areas being greater than 90 minutes away from either Level 1 or 2 hospital care.

Timely geographical access to our most advanced Level 1 hospital care is poorest for those aged 65 years or greater, those of Maori, New Zealand European, and Other ethnic groups, residents with high levels of deprivation, and those usually residing in the central North Island and lower South Island (Table 3). The addition of regional Level 2 hospital care expands the catchment from 60% of the population residing in meshblocks with access to advanced-level hospital care (Level 1 and 2) within 60 minutes to 84% (Table 3). In terms of land area access this equates to 5% of New Zealand's total land area with timely access to Level 1 hospital care within 60 minutes, which increases to 16% with the addition of Level 2 hospital care (results not in table).

Sub-population differences exist in timely access observed by age, ethnicity, level of deprivation and population density (Table 3). The oldest New Zealanders (65+ year olds) have the least access to Level 1 and combined Level 1 and 2 hospital care. No differences

1  
2  
3 were observed by sex. Less than half of the Māori population reside in geographical areas  
4 with timely theoretical access to Level 1 hospital care, increasing to 79% with the inclusion  
5 of Level 2 hospital care, but still lower than other ethnic groups examined. Geographical  
6 areas with timely theoretical access to hospital care have a high proportion of resident Asian,  
7 Pacific and MELAA ethnic groups. The proportion of the population with timely access to  
8 advanced-level hospital care declines with increasing levels of deprivation, the exception to  
9 this is the most deprived group (NZ Dep 9-10) for whom access increased slightly from the  
10 previous level of NZ Dep 7-8, reflecting many of highly deprived areas in New Zealand are  
11 located in main urban areas close to hospitals. Those residing in meshblock areas with the  
12 least deprivation have the greatest degree of timely access. Regions with low to medium  
13 population density have the poorest access to prehospital care, with a paltry 3% of those  
14 usually residing in areas of low population density having access to a Level 1 hospital,  
15 expanding to 15% with the inclusion of Level 2 care.

16  
17  
18  
19  
20  
21  
22  
23  
24  
25 Figure 1 provides a visual representation of the catchment of air and road EMS given the  
26 placement of advanced-level hospitals and EMS bases. Comparing a) and c) provides some  
27 illustration of why timely access to usually resident population is high, but land area access is  
28 low. Timely access is clustered around the main highly populated areas with a population  
29 density in the range 20 to <200,000 people per kilometre. Air EMS services improve the level  
30 of timely access to advanced hospital level care above and beyond road EMS services in all  
31 areas except two in the lower South Island. However, much of the coverage is “doubled-up”  
32 as the combined road/air catchment closely follows the road only catchment. Many areas of  
33 moderate population density are not adequately covered by EMS, and the most isolated  
34 pockets of non-coverage are in areas with low population density.  
35  
36  
37  
38  
39  
40  
41  
42  
43  
44  
45  
46  
47  
48  
49  
50  
51  
52  
53  
54  
55  
56  
57  
58  
59  
60

## DISCUSSION

This research examined the proportion of the usually resident population with theoretical timely access to advanced-level hospital care by air and road EMS in New Zealand and identified disparities in access to these prehospital services. Not surprisingly, timely access is clustered around areas of high population density based on where New Zealand's population usually resides. Applying the concept of the 'golden hour', we estimate 16% of the New Zealand population does not have timely theoretical access to advanced-level hospital care. This equates to around 700,000 New Zealanders without timely access; particular disparities in theoretical timely access were observed for Māori, European New Zealanders, older New Zealanders and those residing in the lower South Island. Regionally based Level 2 hospital services are vital for rural communities to have timely access to care, particularly the Central North Island region where we estimate there is no timely access to the most advanced Level 1 hospital care within 60 minutes.

Previous international studies examining timely theoretical access to care following time-critical acute medical and trauma events have mainly focused on access to trauma services. Prehospital access to advanced trauma care in New Zealand is similar to that observed in the United States and Canada.<sup>6 8 9</sup> Timely access to advanced trauma care via road or air EMS was available to 88% of all United States residents, while 77% of Canadian residents have access via road ambulances.<sup>8 9</sup> Access to critical care services in Scotland is more comprehensive than New Zealand with 94% of the Scottish population within a 45 minute ambulance drive to definitive hospital-level care covering 47% of the Scottish landmass.<sup>18</sup> Unsurprisingly, the catchment of EMS and advanced-level hospital care aligns closely to population density in New Zealand, as also demonstrated in the United States, Canada and Scotland. Advanced-level hospital services are located to serve a large population base making the most efficient use of the resource and maintaining high levels of medical skill and management. This focus on areas of high population density, however, means that areas of disparities are generated on the basis of population density and dispersion. Areas of low to medium population density that have poorer EMS coverage typically have disproportionately greater indigenous Māori and ageing New Zealand European populations, high risk economic activity (such as farming and forestry), and remote areas of recreational and tourist activity.

Our study found significant socio-demographic disparities in timely theoretical access for indigenous Māori, New Zealand Europeans, older New Zealanders and those residing in the

1  
2  
3 southern part of the South Island, reflecting the geographical spread of New Zealand's  
4 population. While most Māori live in urban areas, Māori make up a higher proportion of the  
5 population residing in highly rural and remote areas, by contrast almost all Pacific and the  
6 majority of Asian people in New Zealand live in urban areas.<sup>19</sup> Older New Zealanders, who  
7 are typically New Zealand European, contribute to a high proportion of those who live in  
8 rural areas with low to moderate urban influence, explaining the longer theoretical access  
9 times observed for this group. Regions with low to moderate population density stood out as  
10 being significantly underserved when compared with areas of high population density.

11  
12 Similar disparities in access to advanced-level hospital care have been reported  
13 internationally for those residing in rural areas or very remote areas, and for ethnic  
14 minorities.<sup>6 8-10 18</sup> Our study provides further evidence of disparities in timely theoretical  
15 access to healthcare for Māori and for rural communities, and the unequal distribution of  
16 healthcare resources across New Zealand providing a further pathway for health disparities  
17 for Māori and rural populations: difficulties in achieved access to healthcare for these sub-  
18 groups are already well documented.<sup>20 21</sup> Our results add further support for EMS and  
19 advanced-level hospital services to be optimally configured to address both the geospatial and  
20 socio-demographic challenges of timely access relative to population density in New  
21 Zealand.

22  
23 The optimal placement or enhancement of EMS retrieval and transfer services and advanced  
24 healthcare facilities in New Zealand should be examined further. One of the guiding  
25 principles for New Zealand's health system is that all New Zealanders have "timely and  
26 equitable access" to a "comprehensive range of health and disability services".<sup>22</sup> Our study  
27 found concerning geospatial disparities in timely geographical access for communities with  
28 low to moderate population density which tend to be rural and remote communities with  
29 disproportionately more Māori and older New Zealand Europeans. Furthermore areas with  
30 few permanent residents are popular destinations for international and residential tourists  
31 traveling to, and engaging in, outdoor tourist pursuits in remote back country and alpine  
32 areas. We have identified the need for the combined reach of EMS services and advanced-  
33 level hospital care to consider coverage of socio-demographic and geospatial aspects beyond  
34 just high density residential population bases.

35  
36 Understanding the geospatial distribution of EMS services and timely access into advanced-  
37 level hospital care is the first step in identifying opportunities for improved care and planning  
38 of future services and health policy in the prehospital setting of an advanced trauma and  
39  
40  
41  
42  
43  
44  
45  
46  
47  
48  
49  
50  
51

1  
2  
3 medical system. It is unknown if this current level of under-service results in higher rates of  
4 mortality across New Zealand, and future analyses from this research team will examine this  
5 question further with regard to injury.<sup>16</sup> Geographical areas with limited prehospital air and  
6 road EMS may be adequately served by other groups of appropriated trained first responders,  
7 such as General Practitioners, Police and Fire Services, where they sit outside of existing  
8 EMS catchment areas. Future research should examine the location of other first responders  
9 and the expansion of coverage of EMS these groups potentially provide. Other approaches to  
10 extending access to EMS and advanced-level hospital care include increasing, upgrading or  
11 integrating the roles of regional Level 3 hospitals in the provision of emergency care;  
12 expanding helicopter provision, repositioning existing road or air EMS depots, or providing  
13 novel methods such as delivery of advanced care to critically injured patients or telemedicine  
14 interventions.<sup>6 9</sup>

15  
16  
17  
18  
19  
20  
21  
22  
23 This study has a number of limitations. The choice of geospatial software and assumptions  
24 made are likely to impact the theoretical access estimates presented; we have consciously  
25 chosen conservative assumptions and settings meaning the proportion without timely access  
26 is likely to be underestimated. This analysis also assumes simultaneous dispatch by road and  
27 air EMS services, however the operational reality is that air response can take longer when  
28 emergency first responders are required to assess severity of an acute event prior to helicopter  
29 dispatch. The benefits of the extended air ambulance coverage identified in our analysis  
30 would therefore only be achieved if air ambulance services were dispatched without delay.  
31 Early/ simultaneous activation models have shown clear benefits for prevention of needless  
32 deaths.<sup>23 24</sup> A further limitation is that the EMS scenario theoretically modelled in our  
33 analysis fits a “scoop & run” strategy to prehospital care, and does not consider other  
34 prehospital strategies, such as a differentiated strategy, or rapid delivery of specialist medical  
35 expertise to the patient.<sup>25</sup> Recent empirical evidence suggests that a prehospital strategy  
36 should differentiate by injury type, with the worst case scenario injuries involving penetrating  
37 haemodynamically unstable injury or neurological trauma needing to reach advanced care as  
38 quickly as possible to have the best chance of survival.<sup>26</sup>

39  
40  
41  
42  
43  
44  
45  
46  
47  
48  
49  
50 Our study expands on previous geospatial examinations of access in New Zealand<sup>27</sup> and  
51 internationally<sup>6 9 18</sup> with the use of actual location of road and air based EMS services, with  
52 comparison to usually resident population densities, to assess the actual level of EMS  
53 coverage and response providing valuable geospatial analyses to inform future planning and  
54 expansion of prehospital EMS in New Zealand. As New Zealand is an island nation with a  
55  
56  
57  
58  
59  
60



1  
2  
3 universal nationally funded health care system we are able to consider the closest hospital  
4 care without being restricted by State, Provincial or National funding boundaries, unlike  
5 some international studies.  
6  
7

## 8 **Conclusion**

9  
10  
11 Timely access to advanced-level hospital care is important to increase survival from time-  
12 critical acute injury and medical events. Our study highlights the need for planning of EMS  
13 coverage in areas of moderate to low population density in New Zealand, especially for areas  
14 of moderate to low population density, in order to address inequities with regard to timely  
15 access to advanced-level hospital care. The geographical configuration of EMS and  
16 healthcare systems is important for optimising accessibility to services and promoting the  
17 efficient use of scarce resources in a geographically challenging island nation. Future  
18 analyses will examine if disparities in timely access to advanced-level hospital care translates  
19 into higher rates of mortality due to time critical injuries in New Zealand and identify areas  
20 requiring improved access to EMS and advanced-level hospital care relative to the burden of  
21 prehospital fatal injury.<sup>16</sup>  
22  
23  
24  
25  
26  
27  
28  
29  
30  
31  
32  
33  
34  
35  
36  
37  
38  
39  
40  
41  
42  
43  
44  
45  
46  
47  
48  
49  
50  
51  
52  
53  
54  
55  
56  
57  
58  
59  
60



## Acknowledgements

The authors would like to thank Ian Wilmot (Wilmot Consulting), and staff of the St John, Wellington Free Ambulance and Ministry of Health for supplying data integral to our geospatial analyses.

## Author contributors

R.L. contributed to the study design, conducted the literature review, provided oversight of the spatial analysis and was primarily responsible for the article preparation. B.dG. was primarily responsible for acquiring data and the spatial analysis, as well as contributing to the interpretation of data and preparation of the paper. G.D. contributed to the study design, provided advice on the spatial analysis methods, overseeing the spatial analysis and contributed to the interpretation of data and preparation of the paper. B.K. contributed to the study design, provided oversight of the project, interpretation of results and article preparation. C.B. contributed to the study design, provided advice on the spatial analysis methods and contributed to the direction of the analysis and interpretation of data and preparation of the paper. P.R., A.S., I.C., & B.D. contributed to the study design and to the interpretation of data and preparation of the paper.

## Funding

This research was funded by the Health Research Council of New Zealand project grant (HRC Grant 15/186).

## Competing Interests

The authors have no competing interests to declare.

## Patient consent

Patient level data was not utilised in this study.

## Ethics approval

Ethical approval for the broader programme of research (24), of which this specific study is a part of, was obtained from the University of Auckland Human Participants Ethics Committee (ref 016179), National Coronial Information System (ref NZ007) and University of Otago Health and Disability Ethics Committee (ref OTA/90/02/008/AM05).

## Data sharing statement

1  
2  
3 Data are available from the corresponding author and access to these data will be considered  
4 on a case-by-case basis.  
5  
6  
7  
8  
9  
10  
11  
12  
13  
14  
15  
16  
17  
18  
19  
20  
21  
22  
23  
24  
25  
26  
27  
28  
29  
30  
31  
32  
33  
34  
35  
36  
37  
38  
39  
40  
41  
42  
43  
44  
45  
46  
47  
48  
49  
50  
51  
52  
53  
54  
55  
56  
57  
58  
59  
60

## REFERENCES

1. Centers for Disease Control and Prevention. QuickStats: Percentage of injury deaths for which death was pronounced outside of a hospital, by leading mechanism of injury deaths: United States, 2005. *MMWR* 2008;**57**:1130.
2. Royal Australasian College of Surgeons New Zealand Trauma Committee. *Guidelines for a structured approach to the provision of optimal trauma care*. Wellington: Ministry of Health, 1994.
3. Sasser S, Varghese M, Kellermann A, et al. Prehospital trauma care systems. Geneva: World Health Organization, 2005.
4. Boersma E, Maas ACP, Deckers JW, et al. Early thrombolytic treatment in acute myocardial infarction: reappraisal of the golden hour. *Lancet* 1996;**348**:771-75.
5. Spiotta AM, Vargas J, Turner R, et al. The golden hour of stroke intervention: effect of thrombectomy procedural time in acute ischemic stroke on outcome. *J Neuro Intervent Surg* 2014;**6**:511-16.
6. Branas CC, MacKenzie EJ, Williams JC, et al. Access to trauma centers in the United States. *JAMA* 2005;**293**:2626-33.
7. TraumaMaps.org Copyright 2006. University of Pennsylvania Cartographic Modeling Laboratory. 2006.
8. Carr BG, Bowman AJ, Wolff CS, et al. Disparities in access to trauma care in the United States: A population based analysis. *Injury, Int J Care Injured* 2017;**48**:332-38.
9. Hameed S, Schuurman N, Razek T, et al. Access to trauma systems in Canada. *J Trauma Acute Care Surg* 2010;**69**:1350-61.
10. Hsai R, Shen Y-C. Possible geographical barriers to trauma center access for vulnerable patients in the United States. *Arch Surg* 2011;**146**:46-52.
11. National Health Service. The NHS Atlas of Variation in Healthcare. *Reducing unwarranted variation to increase value and improve quality*. London: National Health Service, 2010.
12. Statistics New Zealand. *Population 2018*. [http://archive.stats.govt.nz/browse\\_for\\_stats/government\\_finance/central\\_government/nz-in-the-oecd/population.aspx](http://archive.stats.govt.nz/browse_for_stats/government_finance/central_government/nz-in-the-oecd/population.aspx). (Accessed Nov 8, 2017).
13. Falconer JA. Preventability of pre-hospital trauma deaths in southern New Zealand. *NZMJ* 2010;**123**:4159.
14. Grey C, Jackson R, Schmidt M, et al. One in four major ischaemic heart disease events are fatal and 60% are pre-hospital deaths: a national data-linkage study (ANZACS-QI 8) *Euro Heart J* 2017;**38**:172-80.
15. Statistics New Zealand. *Geographic boundary files. Secondary Geographic boundary files 2015*. [www.stats.govt.nz/browse-for-stats/Maps-and-geography/Geographic-areas/digital-boundary-files.aspx](http://www.stats.govt.nz/browse-for-stats/Maps-and-geography/Geographic-areas/digital-boundary-files.aspx). (Accessed Nov 8, 2017)
16. Lilley R, Kool B, Davie G, et al. Preventable injury deaths: identifying opportunities to improve timeliness and reach of emergency healthcare services in New Zealand. *Inj Prev* 2017;Published Online First [9 February 2017].
17. Gordon K, Swain A, Thirkell C, et al. The Wellington Life Flight Helicopter Emergency Medical Service (HEMS): a retrospective audit against new Ministry of Health criteria. *NZMJ* 2014;**127**:30-42.
18. Emerson P, Dodds N, Green D, et al. Geographical access to critical care services in Scotland. *J Inten Care Soc* 2018;**19**:6-14.
19. Statistics New Zealand. *New Zealand: An urban/rural profile*. Wellington: Statistics New Zealand, 2004.

- 1  
2  
3 20. Ellison-Loschmann L, Pearce N. Improving access to health care among New Zealand's  
4 Maori population. *Am J Publ Health* 2006;**96**:612-17.  
5 21. Nixon G, Samaranayaka A, de Graaf B, et al. Geographic disparities in the utilisation of  
6 computed tomography scanning services in southern New Zealand. *Health Policy*  
7 2014;**118**:222-28.  
8 22. Ministry of Health. *New Zealand Health Strategy future direction*. Wellington: Ministry  
9 of Health, 2016.  
10 23. Diaz M, Hendey G, Bivins H. When is the helicopter faster? A comparison of helicopter  
11 and ground ambulance transport times. *J Trauma Acute Care Surg* 2005;**58**:148-53.  
12 24. Hankins D. Air medical transport of trauma patients. *Prehosp Emerg Care* 2006;**10**:324-  
13 27.  
14 25. Smith RM, Conn AKT. Prehospital care - scoop and run or stay and play. *Injury, IntJ*  
15 *Care Injured* 2009;**40**:S23-S26.  
16 26. Harmsen AMK, Giannakopoulos GF, Moerbeek PR, et al. The influence of prehospital  
17 time on trauma patients outcome: A systematic review. *Injury, Int J Care Injured*  
18 2015;**46**:602-09.  
19 27. Brabyn L, Skelly C. Modeling population access to New Zealand public hospitals. *Int J*  
20 *Health Geograp* 2002;**1**:3.  
21  
22  
23  
24  
25  
26  
27  
28  
29  
30  
31  
32  
33  
34  
35  
36  
37  
38  
39  
40  
41  
42  
43  
44  
45  
46  
47  
48  
49  
50  
51  
52  
53  
54  
55  
56  
57  
58  
59  
60

**Table 1.** Categories of advanced levels of hospital care in New Zealand

| <b>Level of hospital care</b> | <b>Services provided</b>                                                                                                                                                   | <b>Hospital locations</b>         |
|-------------------------------|----------------------------------------------------------------------------------------------------------------------------------------------------------------------------|-----------------------------------|
| Level 1                       | Advanced trauma and medical services based around comprehensive intensive care units with specialist staff.                                                                | Main population areas             |
| Level 2                       | Capable of initial resuscitation and management. If specific intensive care not available then major trauma and severely ill patients transferred to Level 1 advanced care | Regional & rural provincial areas |
| Level 3                       | Run by non-specialist staff, capable of initial resuscitation. Major trauma and severely ill patients transferred to Level 1 advanced care.                                | Small rural areas                 |

**Table 2.** Overall population and sub-population access to advanced-level hospital care by road and helicopter EMS within specified time periods.

| Socio-demographic characteristics                 | Have access to Level 1 or 2 hospital care within each specified period |       |       |       |                 |
|---------------------------------------------------|------------------------------------------------------------------------|-------|-------|-------|-----------------|
|                                                   | Minutes (row %)                                                        |       |       |       |                 |
|                                                   | Within 30                                                              | 30-45 | 45-60 | 60-90 | Greater than 90 |
| <b>Total Population</b>                           | 24                                                                     | 42    | 17    | 13    | 4               |
| Age (years)                                       |                                                                        |       |       |       |                 |
| 0-14                                              | 22                                                                     | 44    | 19    | 13    | 4               |
| 15-29                                             | 32                                                                     | 41    | 15    | 10    | 3               |
| 30-44                                             | 25                                                                     | 44    | 17    | 11    | 4               |
| 45-64                                             | 22                                                                     | 42    | 19    | 14    | 4               |
| ≥65                                               | 22                                                                     | 40    | 18    | 17    | 4               |
| Sex                                               |                                                                        |       |       |       |                 |
| Male                                              | 24                                                                     | 42    | 17    | 13    | 4               |
| Female                                            | 24                                                                     | 42    | 18    | 13    | 4               |
| Ethnicity                                         |                                                                        |       |       |       |                 |
| New Zealand European                              | 22                                                                     | 40    | 19    | 15    | 3               |
| Māori                                             | 23                                                                     | 36    | 19    | 17    | 4               |
| Pacific                                           | 26                                                                     | 54    | 15    | 5     | 1               |
| Asian                                             | 32                                                                     | 20    | 6     | 3     | 1               |
| MELAA                                             | 31                                                                     | 52    | 9     | 5     | 2               |
| Other                                             | 24                                                                     | 42    | 17    | 13    | 3               |
| Not Stated                                        | 24                                                                     | 42    | 17    | 13    | 3               |
| NZ Deprivation Index                              |                                                                        |       |       |       |                 |
| 1-2 (least deprived)                              | 14                                                                     | 54    | 21    | 7     | 4               |
| 3-4                                               | 19                                                                     | 45    | 19    | 14    | 4               |
| 5-6                                               | 24                                                                     | 39    | 17    | 17    | 4               |
| 7-8                                               | 32                                                                     | 35    | 15    | 16    | 4               |
| 9-10 (most deprived)                              | 32                                                                     | 36    | 15    | 13    | 4               |
| Population Density (persons per km <sup>2</sup> ) |                                                                        |       |       |       |                 |
| High (20-<200,000)                                | 0.3                                                                    | 8     | 37    | 45    | 10              |
| Medium (2-<20)                                    | 0.015                                                                  | 1     | 14    | 57    | 27              |
| Low (0-<2)                                        |                                                                        |       |       |       |                 |

**Table 3.** Usually resident population access to different levels of advanced-level hospital care by road and helicopter EMS within specified time periods

| Demographic characteristics                          | Level 1 hospital access    | Level 1 and 2 hospital access |
|------------------------------------------------------|----------------------------|-------------------------------|
|                                                      | Within 60 minutes<br>Row % | Within 60 minutes<br>Row %    |
| <b>TOTAL</b>                                         | 59.8                       | 84.6                          |
| Age (years)                                          |                            |                               |
| 0-14                                                 | 59.8                       | 84.3                          |
| 15-29                                                | 67.3                       | 88.0                          |
| 30-44                                                | 64.3                       | 86.1                          |
| 45-64                                                | 58.0                       | 82.6                          |
| 65+                                                  | 50.7                       | 79.4                          |
| Sex                                                  |                            |                               |
| Male                                                 | 59.7                       | 83.4                          |
| Female                                               | 59.9                       | 83.9                          |
| Ethnicity                                            |                            |                               |
| New Zealand European                                 | 55.3                       | 81.5                          |
| Māori                                                | 45.6                       | 78.7                          |
| Pacific                                              | 84.4                       | 94.7                          |
| Asian                                                | 87.4                       | 96.1                          |
| MELAA                                                | 82.9                       | 93.0                          |
| Other                                                | 52.7                       | 80.8                          |
| Not stated                                           | 59.9                       | 83.7                          |
| NZ Deprivation Index                                 |                            |                               |
| 1-2 (least deprived)                                 | 73.4                       | 90.0                          |
| 3-4                                                  | 62.0                       | 83.0                          |
| 5-6                                                  | 54.9                       | 79.9                          |
| 7-8                                                  | 53.9                       | 80.5                          |
| 9-10 (most deprived)                                 | 55.1                       | 83.6                          |
| Population Density<br>(persons per km <sup>2</sup> ) |                            |                               |
| High (20-<200,000)                                   | 64.3                       | 88.0                          |
| Medium (2-<20)                                       | 17.1                       | 45.3                          |
| Low (0-<2)                                           | 2.8                        | 15.2                          |

1  
2  
3 Figure 1 legend  
4

5 **Figure 1.** Access to advanced-level hospital care in New Zealand within 60 minutes. a:

6  
7 Population density. b: Road EMS coverage. c: Road or air EMS coverage.  
8  
9  
10  
11  
12  
13  
14  
15  
16  
17  
18  
19  
20  
21  
22  
23  
24  
25  
26  
27  
28  
29  
30  
31  
32  
33  
34  
35  
36  
37  
38  
39  
40  
41  
42  
43  
44  
45  
46  
47  
48  
49  
50  
51  
52  
53  
54  
55  
56  
57  
58  
59  
60



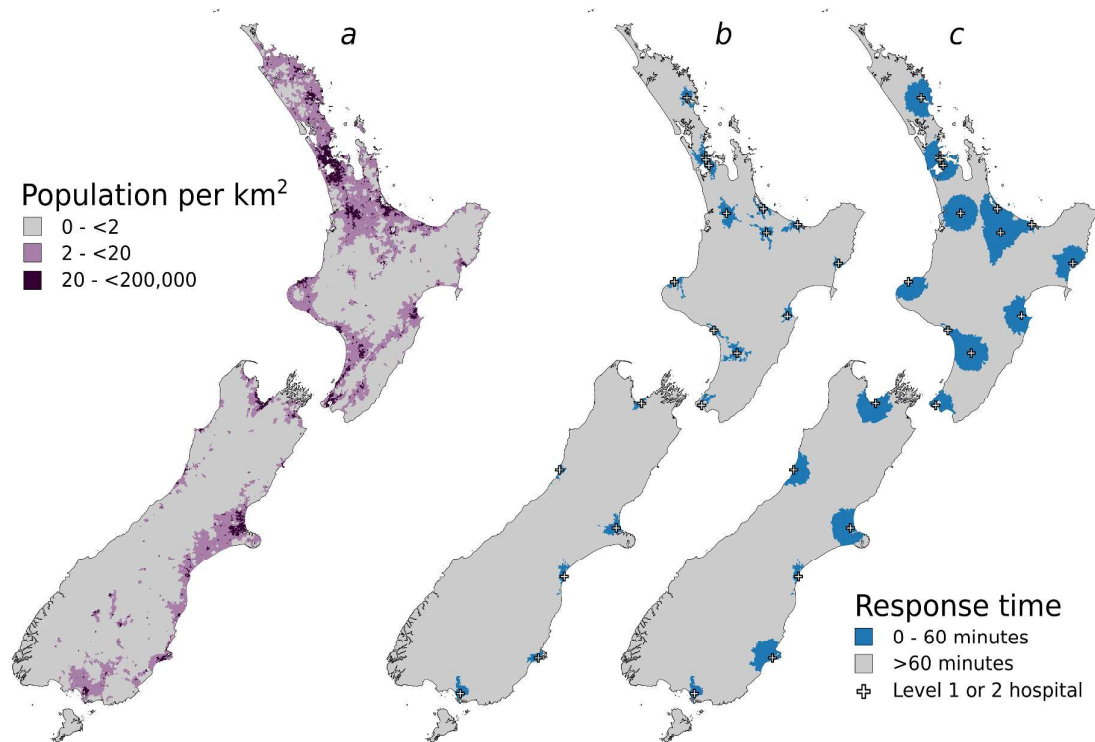

**Figure 1.** Access to advanced-level hospital care in New Zealand within 60 minutes. a: Population density. b: Road EMS coverage. c: Road or air EMS coverage.

# BMJ Open

## Geographical and population disparities in timely access to prehospital and advanced level emergency care in New Zealand: a cross-sectional study

|                                 |                                                                                                                                                                                                                                                                                                                                                                                                                                                                                                                                                                                                                                                                                                                                                                                                                                                                                                           |
|---------------------------------|-----------------------------------------------------------------------------------------------------------------------------------------------------------------------------------------------------------------------------------------------------------------------------------------------------------------------------------------------------------------------------------------------------------------------------------------------------------------------------------------------------------------------------------------------------------------------------------------------------------------------------------------------------------------------------------------------------------------------------------------------------------------------------------------------------------------------------------------------------------------------------------------------------------|
| Journal:                        | <i>BMJ Open</i>                                                                                                                                                                                                                                                                                                                                                                                                                                                                                                                                                                                                                                                                                                                                                                                                                                                                                           |
| Manuscript ID                   | bmjopen-2018-026026.R1                                                                                                                                                                                                                                                                                                                                                                                                                                                                                                                                                                                                                                                                                                                                                                                                                                                                                    |
| Article Type:                   | Research                                                                                                                                                                                                                                                                                                                                                                                                                                                                                                                                                                                                                                                                                                                                                                                                                                                                                                  |
| Date Submitted by the Author:   | 02-Apr-2019                                                                                                                                                                                                                                                                                                                                                                                                                                                                                                                                                                                                                                                                                                                                                                                                                                                                                               |
| Complete List of Authors:       | Lilley, Rebecca; University of Otago Division of Health Sciences, Department of Preventive and Social Medicine<br>de Graaf, Brandon; University of Otago Division of Health Sciences, Department of Preventive and Social Medicine<br>Kool, Bridget; The University of Auckland, Section of Epidemiology and Biostatistics<br>Davie, Gabrielle; University of Otago Division of Health Sciences, Department of Preventive and Social Medicine<br>Reid, Papaarangi; University of Auckland, Te Kupenga Hauora Māori<br>Dicker, Bridget; Auckland University of Technology Faculty of Health and Environmental Sciences, Paramedicine<br>Civil, Ian; University of Auckland, Surgery; Auckland City Hospital, Trauma and Vascular Surgeon<br>Ameratunga, Shanthi; The University of Auckland, Section of Epidemiology and Biostatistics<br>Branas, Charles; Columbia University, Department of Epidemiology |
| <b>Primary Subject Heading</b>: | Public health                                                                                                                                                                                                                                                                                                                                                                                                                                                                                                                                                                                                                                                                                                                                                                                                                                                                                             |
| Secondary Subject Heading:      | Emergency medicine, Public health                                                                                                                                                                                                                                                                                                                                                                                                                                                                                                                                                                                                                                                                                                                                                                                                                                                                         |
| Keywords:                       | geospatial analysis, PUBLIC HEALTH, Organisation of health services < HEALTH SERVICES ADMINISTRATION & MANAGEMENT, access to services, ACCIDENT & EMERGENCY MEDICINE                                                                                                                                                                                                                                                                                                                                                                                                                                                                                                                                                                                                                                                                                                                                      |
|                                 |                                                                                                                                                                                                                                                                                                                                                                                                                                                                                                                                                                                                                                                                                                                                                                                                                                                                                                           |

SCHOLARONE™  
Manuscripts

**Proposed paper title:** “*Geographical and population disparities in timely access to prehospital and advanced level emergency care in New Zealand: a cross-sectional study*”

Short: Disparities in access to prehospital trauma and medical care in NZ

**Authors & Affiliations:** Lilley R<sup>1</sup>, de Graaf B<sup>1</sup>, Kool B<sup>2</sup>, Davie G<sup>1</sup>, Reid P<sup>3</sup>, Dicker B<sup>4,5</sup>, Civil I<sup>6</sup>, Ameratunga S<sup>2</sup>, Branas CC<sup>7</sup>

1 - Injury Prevention Research Unit, Department of Preventive and Social Medicine, Dunedin School of Medicine, University of Otago, New Zealand; 2 – Section of Epidemiology and Biostatistics, School of Population Health, University of Auckland, New Zealand; 3 - Te Kupenga Hauora Māori, Faculty of Medical and Health Sciences, University of Auckland, New Zealand; 4 - Department of Paramedicine, Auckland University of Technology, Auckland, New Zealand; 5 - St John, Mt Wellington, Auckland, New Zealand; 6 – Trauma Services, Auckland District Health Board, Auckland, New Zealand; 7 - Department of Epidemiology, Columbia University Mailman School of Public Health, New York, United States of America.

**Corresponding author & present address:** Dr Rebecca Lilley, Injury Prevention Research Unit, Department of Preventive and Social Medicine, Dunedin School of Medicine, University of Otago, P.O. Box 56, Dunedin 9054, New Zealand.

Corresponding author e-mail address: rebecca.lilley@ipru.otago.ac.nz

**Author e-mail addresses:** rebecca.lilley@ipru.otago.ac.nz;  
brandon.degraaf@otago.ac.nz, b.kool@auckland.ac.nz, gabrielle.davie@otago.ac.nz;  
p.reid@auckland.ac.nz, IanC@adhb.govt.nz, Bridget.Dicker@stjohn.org.nz;  
s.ameratunga@auckland.ac.nz, c.branas@columbia.edu

Abstract word count 262; main body word count 3452; tables 3; figures 1 references 27

## ABSTRACT

**OBJECTIVE:** Rapid access to advanced emergency medical and trauma care has been shown to significantly reduce mortality and disability. This study aims to systematically examine geographical access to prehospital care provided by Emergency Medical Services (EMS) and advanced-level hospital care, for the smallest geographical units used in New Zealand and explores national disparities in geographical access to these services.

**DESIGN:** Observational study involving geospatial analysis of theoretical population access to EMS and advanced-level hospital care.

**SETTING:** Population access to advanced-level hospital care via road and air EMS across New Zealand.

**PARTICIPANTS:** New Zealand population usually resident within geographical Census meshblocks.

**PRIMARY AND SECONDARY OUTCOME MEASURES:** The proportion of the resident population with calculated EMS access to advanced-level hospital care within 60 minutes was examined by age, sex, ethnicity, level of deprivation, and population density to identify disparities in geographical access.

**RESULTS:** An estimated 16% of the New Zealand population does not have timely EMS access to advanced-level hospital care via road or air. The 700,000 New Zealanders without timely access lived mostly in areas of low-moderate population density. Indigenous Māori, New Zealand European and older New Zealanders were less likely to have timely access.

**CONCLUSIONS:** These findings suggest that in New Zealand, geographically marginalised groups which tend to be rural and remote communities with disproportionately more indigenous Māori and older adults have poorer EMS access to advanced-level hospitals. Addressing these inequities in rapid access to medical care may lead to improvements in survival that have been documented for people who experience medical or surgical emergencies.

**FUNDING:** Health Research Council of New Zealand (HRC 15/186)

**KEY WORDS:** Emergency Medical Services; Geospatial; GIS; Hospital; Health Services  
Access; Time-to-treatment

For peer review only

## Article Summary

### Strengths and limitations of this study

This study is the first step in assessing access to emergency medical services (EMS) in New Zealand, a long, narrow and geographically challenging island nation in the South Pacific with a small, geographically dispersed population.

This study expands on previous international assessments of timely access to emergency hospital-level care by mapping exact locations of EMS response.

The choice of geospatial software and consciously conservative assumptions made are likely to underestimate the impact the theoretical access estimates presented.

The EMS scenario theoretically modelled in our analysis fits a “scoop & run” strategy to prehospital care, and does not consider other prehospital strategies, such as a differentiated strategy, or rapid delivery of specialist medical expertise to the patient.

## INTRODUCTION

Globally, millions of people with life-threatening injuries or health events require timely access to advanced healthcare services, including prehospital emergency services, to prevent needless mortality and morbidity.<sup>1</sup> The public health burden of time-critical medical emergencies can be further exacerbated in countries with challenging terrain, long travel distances, and dispersed populations, despite relative economic standing and available resources.<sup>2</sup> New Zealand is one country where these natural and population features are a daily challenge to the timely and equitable delivery of prehospital emergency care.

Death and disability due to acute medical emergencies can be significantly reduced by the timely provision of prehospital emergency healthcare, thereby presenting many opportunities for tertiary prevention. Optimal models of trauma care delivery, focusing on a continuum of timely emergency medical services (EMS) to efficient in-hospital care, start with the rapid provision of prehospital EMS, provide the best chance for survival and rehabilitation following injury.<sup>1 3 4</sup> A time sensitive approach has also been proven to benefit patients requiring EMS following cardiac, stroke and vascular events.<sup>5 6</sup>

EMS are a vital entry point into the continuum of acute emergency health care, as their primary role is to rapidly meet the emergency prehospital care needs of patients following time-critical injury or health events. In terms of receiving hospital-level treatment, the first hour, commonly referred to as the 'golden hour', is generally considered to be the most critical in terms of receiving definitive treatment for cases with time-critical injuries or health conditions.<sup>4</sup> Although not supported by a strong evidence-base, access to EMS and advanced-level hospital care is often judged against this threshold.<sup>7 8</sup> Disparities in timely access to advanced-level hospitals have been documented in numerous countries, identifying higher risk of delayed access for communities and vulnerable groups.<sup>7 9-12</sup>

New Zealand's mountainous terrain, long travel distances, and relatively small and geographically dispersed population of 4.2 million can severely hinder physical/transport access to advanced hospital-level care impacting timely and equitable delivery of prehospital EMS. New Zealand's population density is relatively low at 15 people per square kilometre, considerably less than countries with similar land area such as the United Kingdom with 243 people per square kilometre. Despite having low overall population density, New Zealand is highly urbanised, with 86% of the population living in urban areas.<sup>13</sup> Case reviews in New

1  
2  
3 Zealand suggest there are opportunities to improve prehospital EMS and reduce the number  
4 of prehospital deaths.<sup>14 15</sup>

6  
7 This study systematically examines geographical proximity and access to prehospital care  
8 provided by EMS and advanced-level hospital care, for the smallest geographical units used  
9 in New Zealand, in order to identify opportunities to improve survivability and reduce  
10 disability following time-critical medical emergencies, and explores national disparities in  
11 geographical access to these services.

## 16 17 **METHODS**

### 18 19 **Advanced level hospital care in New Zealand**

20  
21  
22 There are three levels of classification for New Zealand hospitals, relating to their capability  
23 to provide the appropriate services for seriously injured or ill patients (Table 1). New Zealand  
24 has a unique system where by trauma response, treatment, and rehabilitation are funded by  
25 the universal, no-fault, publicly funded Accident Compensation Corporation (ACC). In  
26 contrast, medical response, treatment and rehabilitation is publicly funded by each individual  
27 District Health Board with some part-charges for ambulance services.

### 28 29 **Data sources**

30  
31  
32 For this study we used Census 2013 (most recent publically available data) meshblock  
33 boundary and characteristics information available from Statistics New Zealand.<sup>16</sup>  
34  
35 Meshblocks are the smallest geographical unit available. In the 2013 census there were  
36 45,989 meshblocks ranging in size from part of a city block containing approximately 110  
37 people to a large area of rural land containing approximately 60 people. In addition to the  
38 boundary shapefiles, we obtained sociodemographic, deprivation and urbanity characteristics  
39 of the population usually residing within each meshblock.<sup>16</sup>

40  
41  
42 The physical addresses of advanced-level (Level 1 and 2) hospitals were converted to  
43 geographical longitude-latitude coordinates. The locations of road ambulance stations as at  
44 2014/15 were obtained from the two providers of these services in New Zealand, St. John  
45 Ambulance (New Zealand's major provider serving 98% of the population) and Wellington  
46 Free Ambulance. Air EMS services were restricted to helicopter based services in use in 2016  
47 and their longitude-latitude coordinates were derived from multiple sources, including the  
48 Civil Aviation Authority, the Hawkes Bay Rescue Helicopter Trust, and Google Maps. Road  
49  
50  
51  
52  
53  
54  
55  
56  
57  
58  
59  
60



1  
2  
3 network data was obtained from [www.geofabrik.de](http://www.geofabrik.de), an online open street map and spatial  
4 data provider.

### 5 6 7 Geospatial access calculations

8  
9  
10 The continuous access times were categorised using relatively fine-grained (<30, 30-45, 45-  
11 60, 60-90, ≥90) categories for descriptive purposes and to ensure the use of the ‘golden hour’  
12 was sensible for the NZ population. Timely access was defined as the proportion of the  
13 population or land area from which an injured person was theoretically able to reach an  
14 advanced-level hospital within a given time of 60 minutes via air and road EMS. Access was  
15 calculated using established geospatial methods previously described elsewhere.<sup>7 17</sup> The time  
16 required for the nearest air or road EMS to reach the geometric centroid of a meshblock,  
17 stabilise a patient, and then travel to the nearest advanced-level hospital was calculated for  
18 every meshblock.  
19  
20  
21  
22  
23  
24

25  
26 Road network travel times included the following assumption obtained from St Johns:  
27 immediate response and average road ambulance time at scene 14 minutes and 49 seconds.  
28 Road ambulance drive times were calculated using the Open Source Routing Machine  
29 (OSRM available at [www.project-osrm.org](http://www.project-osrm.org)). A detailed description on how spatial data are  
30 modelled in OSRM is available elsewhere.<sup>18</sup> All road calculations assumed ambulances drove  
31 at legal road speed, did not stop at intersections, driving conditions were ideal (i.e. no  
32 congestion), and ambulances drove the shortest route.  
33  
34  
35  
36  
37  
38

39 Air EMS travel times assumed helicopters flew in straight lines at an operational speed of  
40 182 km/hour, response time (preparation for lift-off) of 8 minutes, on scene time of 27  
41 minutes and 28 seconds, plus 32 seconds to find a safe pick-up landing site.<sup>19</sup> Air EMS flight  
42 times were calculated using custom written Python code running inside QGIS software.  
43  
44  
45  
46

### 47 Sociodemographic variables

48  
49 Sociodemographic data on age, sex and ethnicity was obtained by summing the subtotal of  
50 each characteristic across all meshblocks, thus estimating the population of New Zealand at  
51 the time of the 2013 Census. Age was grouped into five categories: 0-14, 15-29, 30-44, 45-64  
52 and ≥65 years. The five categories of ethnicity used were: Māori (Indigenous population),  
53 Pacific, Asian, New Zealand European, and MELAA (Middle Eastern, Latin American,  
54 African) and Other. Census ethnicity data is not prioritised, with individuals able to record  
55  
56  
57  
58  
59  
60

1  
2  
3 multiple ethnicities, therefore all ethnicities reported are counted resulting in totals greater  
4 than 100%.  
5  
6

7 Deprivation was derived using the 2013 New Zealand Deprivation Index (NZDep), which  
8 aggregates and ranks communication, income, employment, family support, qualifications,  
9 home ownership, living space and transport within each meshblock area.<sup>20</sup> NZDep deciles  
10 were categorised into quintiles, with '1-2' representing the least deprived 20% and '9-10' the  
11 most deprived 20% of meshblocks in New Zealand. Population density within each  
12 meshblock area was calculated using number of usually resident people divided by  
13 meshblock area, grouped into three categories: high (20 to <200,000), medium (2 to <20) and  
14 low (0 to <2 persons per kilometre<sup>2</sup>).  
15  
16  
17  
18  
19  
20  
21

## 22 Statistical analyses

23  
24 Our unit of analysis was the 2013 Census meshblock. The count of usually resident  
25 populations within each Census 2013 meshblock was summed across the country to obtain  
26 national denominators. The sociodemographic, deprivation and urbanity characteristics of the  
27 population unable to access advanced-level care within key times are described using row  
28 percentages. Binomial exact 95% confidence intervals were calculated for row percentages  
29 using Stata version 13 SE.  
30  
31  
32  
33  
34  
35

36 A map of New Zealand was created to provide a visual representation of the areas within  
37 New Zealand that cannot access advanced-level hospital care via air and road EMS within 60  
38 minutes.  
39  
40  
41

## 42 Patient and public involvement.

43  
44 This study is a theoretical modelling geospatial analysis with no direct contact with study  
45 participants or patients or the public thus they were not involved in: 1) developing the  
46 research question and outcome measures; 2) planning the study design; and 3) the recruitment  
47 and conduct of the study. A study advisory group included patient and client representatives  
48 from SafeKids New Zealand, St Johns New Zealand, Pacifica Injury Prevention Aukilana  
49 (PIPA), Fire and Emergency New Zealand, Accident Compensation Corporation, and  
50 National Ambulance Sector Office. Dissemination of the study's findings will include  
51 meetings where patients/public and community groups engage, including the public health  
52 and injury prevention and control meetings.  
53  
54  
55  
56  
57  
58  
59  
60

## Ethical Approval

Ethical approval for the broader programme of research<sup>17</sup>, of which this specific study is a part of, was obtained from the University of Auckland Human Participants Ethics Committee (ref 016179), National Coronial Information System (ref NZ007) and University of Otago Health and Disability Ethics Committee (ref OTA/90/02/008/AM05).

## RESULTS

Access to advanced-level hospital care by air or road EMS takes over 60 minutes for the majority (84%) of New Zealand's land area. While less than 16% of our land area allows emergency access via road or air (3.5% accessible by road only and 15% by air only) within 60 minutes, a substantial majority (83%) of New Zealanders live within those areas that do have timely access to advanced hospital level care within 60 minutes (Table 2). Close to one quarter (24%) of New Zealanders are estimated to have access to advanced-level hospital care within 30 minutes and two thirds (66%) within 45 minutes, 13% of the population are estimated to take up to 30 minutes longer than the 'golden hour' (i.e. within 60-90 minutes), and 4% are estimated to take greater than 90 minutes to access to advanced level hospital care.

Significant population differences in timely access were observed by ethnicity and population density. Persons identifying with the Asian ethnic group have the best theoretical access to hospital level care, with only 0.78% residing in meshblocks greater than 90 minutes away from Level 1 or 2 hospital care. In contrast, those of Māori ethnicity had the poorest level of access with 4% living in meshblocks greater than 90 minutes away from advanced-level hospital care (difference in proportion 3.22%, 95% CI 2.19,4.48). With respect to population density, access was poorest for people usually residing in lower density areas meshblocks, with 27% of people usually resident in low density areas versus 2% of people usually resident in high density areas being greater than 90 minutes away from either Level 1 or 2 hospital care (difference in proportion 25%, 95% CI 22, 27).

Timely geographical access to our most advanced Level 1 hospital care is poorest for those aged 65 years or greater, those of Māori, New Zealand European, and Other ethnic groups, residents with high levels of deprivation, and those usually residing in the central North Island and lower South Island (Table 3). The addition of regional Level 2 hospital care significantly expands the catchment from 59.8% (95% CI 56.7, 62.9) of the population

1  
2  
3 residing in meshblocks with access to advanced-level hospital care (Level 1 and 2) within 60  
4 minutes to 84.6% (95% CI 82.2, 86.8) (Table 3). In terms of land area access this equates to  
5 5% (95% CI 4,7) of New Zealand's total land area with timely access to Level 1 hospital care  
6  
7 within 60 minutes, which increases to 16% (95% CI 14,18) with the addition of Level 2  
8  
9 hospital care (results not in table).

10  
11  
12 Sub-population differences exist in timely access observed by age, ethnicity, level of  
13 deprivation and population density (Table 3). The oldest New Zealanders (65+ year olds)  
14 have the least access to Level 1 (5.7%, 95% CI 47.6, 53.8) and combined Level 1 and 2  
15 hospital care (79.4%, 95% CI 76.8, 81.9). Less than half of the Māori population (45.6%,  
16 95% CI 42.5, 48.7) reside in geographical areas with timely theoretical access to Level 1  
17 hospital care, increasing to 78.7% (95% CI 76.0, 81.2) with the inclusion of Level 2 hospital  
18 care, but still significantly lower than the Pacific, Asian and MELAA other ethnic groups.  
19 Geographical areas with timely theoretical access to hospital care have a high proportion of  
20 resident Asian, Pacific and MELAA ethnic groups. The proportion of the population with  
21 timely access to advanced-level hospital care declines with increasing levels of deprivation,  
22 the exception to this is the most deprived group (NZ Dep 9-10) for whom access increased  
23 slightly from the previous level of NZ Dep 7-8, reflecting many of highly deprived areas in  
24 New Zealand are located in main urban areas close to hospitals. Those residing in meshblock  
25 areas with the least deprivation have a significantly better degree of timely access. Regions  
26 with low to medium population density have the poorest access to prehospital care, with a  
27 paltry 2.8% (95% CI 1.8, 4.0) of those usually residing in areas of low population density  
28 having access to a Level 1 hospital, expanding to 15.2% (95% CI 13.0, 17.6) with the  
29 inclusion of Level 2 care. No differences were observed by sex.

30  
31  
32 Figure 1 provides a visual representation of the catchment of air and road EMS given the  
33 placement of advanced-level hospitals and EMS bases. Comparing a) and c) provides some  
34 illustration of why timely access to usually resident population is high, but land area access is  
35 low. Timely access is clustered around the main highly populated areas with a population  
36 density in the range 20 to <200,000 people per kilometre. Air EMS services improve the level  
37 of timely access to advanced hospital level care above and beyond road EMS services in all  
38 areas except two in the lower South Island. However, much of the coverage is “doubled-up”  
39 as the combined road/air catchment closely follows the road only catchment. Many areas of  
40 moderate population density are not adequately covered by EMS, and the most isolated  
41 pockets of non-coverage are in areas with low population density.

## DISCUSSION

This research examined the proportion of the usually resident population with theoretical timely access to advanced-level hospital care by air and road EMS in New Zealand and identified significant disparities in access to these prehospital services. Not surprisingly, timely access is clustered around areas of high population density based on where New Zealand's population usually resides. Applying the concept of the 'golden hour', we estimate 16% of the New Zealand population does not have timely theoretical access to advanced-level hospital care via road or air EMS. This equates to around 700,000 New Zealanders without timely access; particular disparities in theoretical timely access were observed for Māori, European New Zealanders, older New Zealanders and those residing in the lower South Island. Regionally based Level 2 hospital services are vital for rural communities to have timely access to care, particularly the Central North Island region where we estimate there is no timely access to the most advanced Level 1 hospital care within 60 minutes.

Previous international studies examining timely theoretical access to care following time-critical acute medical and trauma events have mainly focused on access to trauma services. Prehospital access to advanced trauma care in New Zealand is similar to that observed in the United States and Canada.<sup>7 9 10</sup> Timely access to advanced trauma care via road or air EMS was available to 88% of all United States residents, while 77% of Canadian residents have access via road ambulances.<sup>9 10</sup> Access to critical care services in Scotland is more comprehensive than New Zealand with 94% of the Scottish population within a 45 minute ambulance drive to definitive hospital-level care covering 47% of the Scottish landmass.<sup>21</sup> Unsurprisingly, the catchment of EMS and advanced-level hospital care aligns closely to population density in New Zealand, as also demonstrated in the United States, Canada and Scotland. Advanced-level hospital services are located to serve a large population base making the most efficient use of the resource and maintaining high levels of medical skill and management. This focus on areas of high population density, however, means that areas of disparities are generated on the basis of population density and dispersion. Areas of low to medium population density that have poorer EMS coverage typically have disproportionately greater indigenous Māori and ageing New Zealand European populations, high risk economic activity (such as farming and forestry), and remote areas of recreational and tourist activity.

Our study found significant socio-demographic disparities in timely theoretical access for indigenous Māori, New Zealand Europeans, older New Zealanders and those residing in the

1  
2  
3 southern part of the South Island, reflecting the geographical spread of New Zealand's  
4 population. While most Māori live in urban areas, Māori make up a higher proportion of the  
5 population residing in highly rural and remote areas, by contrast almost all Pacific and the  
6 majority of Asian people in New Zealand live in urban areas.<sup>22</sup> Older New Zealanders, who  
7 are typically New Zealand European, contribute to a high proportion of those who live in  
8 rural areas with low to moderate urban influence, explaining the longer theoretical access  
9 times observed for this group. Regions with low to moderate population density stood out as  
10 being significantly underserved when compared with areas of high population density.  
11 Similar disparities in access to advanced-level hospital care have been reported  
12 internationally for those residing in rural areas or very remote areas, and for ethnic  
13 minorities.<sup>7-9-11 21</sup> Our study provides further evidence of disparities in timely theoretical  
14 access to healthcare for Māori and for rural communities, and the unequal distribution of  
15 healthcare resources across New Zealand providing a further pathway for health disparities  
16 for Māori and rural populations: difficulties in achieved access to healthcare for these sub-  
17 groups are already well documented.<sup>23 24</sup> Our results add further support for EMS and  
18 advanced-level hospital services to be optimally configured to address both the geospatial and  
19 socio-demographic challenges of timely access relative to population density in New  
20 Zealand.

21  
22  
23  
24  
25  
26  
27  
28  
29  
30  
31  
32  
33  
34  
35 The optimal placement or enhancement of EMS retrieval and transfer services and advanced  
36 healthcare facilities in New Zealand should be examined further. One of the guiding  
37 principles for New Zealand's health system is that all New Zealanders have "timely and  
38 equitable access" to a "comprehensive range of health and disability services".<sup>25</sup> Our study  
39 found concerning geospatial disparities in timely geographical access for communities with  
40 low to moderate population density which tend to be rural and remote communities with  
41 disproportionately more Māori and older New Zealand Europeans. Furthermore areas with  
42 few permanent residents are popular destinations for international and residential tourists  
43 traveling to, and engaging in, outdoor tourist pursuits in remote back country and alpine  
44 areas. We have identified the need for the combined reach of EMS services and advanced-  
45 level hospital care to consider coverage of socio-demographic and geospatial aspects beyond  
46 just high density residential population bases.

47  
48  
49  
50  
51  
52  
53  
54  
55  
56  
57 Understanding the geospatial distribution of EMS services and timely access into advanced-  
58 level hospital care is the first step in identifying opportunities for improved care and planning  
59 of future services and health policy in the prehospital setting of an advanced trauma and  
60



1  
2  
3 medical system. It is unknown if this current level of under-service results in higher rates of  
4 mortality across New Zealand, and future analyses from this research team will examine this  
5 question further with regard to injury.<sup>17</sup> Geographical areas with limited prehospital air and  
6 road EMS may be adequately served by other groups of appropriated trained first responders,  
7 such as General Practitioners, Police and Fire Services, where they sit outside of existing  
8 EMS catchment areas. Future research should examine the location of other first responders  
9 and the expansion of coverage of EMS these groups potentially provide. Other approaches to  
10 extending access to EMS and advanced-level hospital care include increasing, upgrading or  
11 integrating the roles of regional Level 3 hospitals in the provision of emergency care;  
12 expanding helicopter provision, repositioning existing road or air EMS depots, or providing  
13 novel methods such as delivery of advanced care to critically injured patients or telemedicine  
14 interventions.<sup>7 10</sup>

15  
16  
17  
18  
19  
20  
21  
22  
23  
24  
25 This study has a number of limitations. The choice of geospatial software and assumptions  
26 made are likely to impact the theoretical access estimates presented; we have consciously  
27 chosen conservative assumptions and settings meaning the proportion without timely access  
28 is likely to be underestimated. This analysis also assumes simultaneous dispatch by road and  
29 air EMS services, however the operational reality is that air response can take longer when  
30 emergency first responders are required to assess severity of an acute event prior to helicopter  
31 dispatch. It also assumes the availability of suitable helicopter landing sites at the meshblock  
32 centroid which may not be available. The benefits of the extended air ambulance coverage  
33 identified in our analysis would therefore only be achieved if air ambulance services were  
34 dispatched without delay and if suitable helicopter landing sites were available. Early/  
35 simultaneous activation models have shown clear benefits for prevention of needless deaths.<sup>26</sup>  
36  
37  
38  
39  
40  
41  
42  
43  
44  
45  
46  
47  
48  
49  
50  
51  
52  
53  
54  
55  
56  
57  
58  
59  
60  
27 A further limitation is that the EMS scenario theoretically modelled in our analysis fits a  
“scoop & run” strategy to prehospital care, and does not consider other prehospital strategies,  
such as a differentiated strategy, or rapid delivery of specialist medical expertise to the  
patient.<sup>28</sup> Recent empirical evidence suggests that a prehospital strategy should differentiate  
by injury type, with the worst case scenario injuries involving penetrating haemodynamically  
unstable injury or neurological trauma needing to reach advanced care as quickly as possible  
to have the best chance of survival.<sup>29</sup> The use of centroids may have led to geographic  
selection bias when a meshblock sits on edge of the time boundary, yet the centroid sits  
outside this boundary and is not selected. The potential for geographic selection bias is  
thought to be balanced out by the inclusion of similar sized meshblock’s in close proximity

1  
2  
3 with partial coverage over a time boundary where the centroid sits inside the boundary.  
4 Manual review of the 1044 large, remote meshblocks where the centroid was 10 km, or  
5 greater, from the nearest road revealed no part of these area units was reachable by air or road  
6 EMS within the time-limits examined.  
7  
8  
9

10  
11 Our study expands on previous geospatial examinations of access in New Zealand<sup>30</sup> and  
12 internationally<sup>7 10 21</sup> with the use of actual location of road and air based EMS services, with  
13 comparison to usually resident population densities, to assess the actual level of EMS  
14 coverage and response providing valuable geospatial analyses to inform future planning and  
15 expansion of prehospital EMS in New Zealand. As New Zealand is an island nation with a  
16 universal nationally funded health care system we are able to consider the closest hospital  
17 care without being restricted by State, Provincial or National funding boundaries, unlike  
18 some international studies.  
19  
20  
21  
22  
23  
24

## 25 **Conclusion**

26  
27  
28 Timely access to advanced-level hospital care is important to increase survival from time-  
29 critical acute injury and medical events. Our study highlights the need for planning of EMS  
30 coverage in New Zealand, especially for areas of moderate to low population density, in order  
31 to address inequities with regard to timely access to advanced-level hospital care. The  
32 geographical configuration of EMS and healthcare systems is important for optimising  
33 accessibility to services and promoting the efficient use of scarce resources in a  
34 geographically challenging island nation. Future analyses will examine if disparities in timely  
35 access to advanced-level hospital care translates into higher rates of mortality due to time  
36 critical injuries in New Zealand and identify areas requiring improved access to EMS and  
37 advanced-level hospital care relative to the burden of prehospital fatal injury.<sup>17</sup>  
38  
39  
40  
41  
42  
43  
44  
45  
46  
47  
48  
49  
50  
51  
52  
53  
54  
55  
56  
57  
58  
59  
60



## Acknowledgements

The authors would like to thank Ian Wilmot (Wilmot Consulting), and staff of the St John, Wellington Free Ambulance and Ministry of Health for supplying data integral to our geospatial analyses.

## Author contributors

R.L. contributed to the study design, conducted the literature review, provided oversight of the spatial analysis and was primarily responsible for the article preparation. B.dG. was primarily responsible for acquiring data and the spatial analysis, as well as contributing to the interpretation of data and preparation of the paper. G.D. contributed to the study design, provided advice on the spatial analysis methods, overseeing the spatial analysis and contributed to the interpretation of data and preparation of the paper. B.K. contributed to the study design, provided oversight of the project, interpretation of results and article preparation. C.B. contributed to the study design, provided advice on the spatial analysis methods and contributed to the direction of the analysis and interpretation of data and preparation of the paper. P.R., S.A, I.C., & B.D. contributed to the study design and to the interpretation of data and preparation of the paper.

## Funding

This research was funded by the Health Research Council of New Zealand project grant (HRC Grant 15/186).

## Competing Interests

The authors have no competing interests to declare.

## Patient consent

Patient level data was not utilised in this study.

## Ethics approval

Ethical approval for the broader programme of research<sup>17</sup>, of which this specific study is a part of, was obtained from the University of Auckland Human Participants Ethics Committee (ref 016179), National Coronial Information System (ref NZ007) and University of Otago Health and Disability Ethics Committee (ref OTA/90/02/008/AM05).

## Data sharing statement

1  
2  
3 Data are available from the corresponding author and access to these data will be considered  
4 on a case-by-case basis.  
5  
6  
7  
8  
9  
10  
11  
12  
13  
14  
15  
16  
17  
18  
19  
20  
21  
22  
23  
24  
25  
26  
27  
28  
29  
30  
31  
32  
33  
34  
35  
36  
37  
38  
39  
40  
41  
42  
43  
44  
45  
46  
47  
48  
49  
50  
51  
52  
53  
54  
55  
56  
57  
58  
59  
60

For peer review only

## REFERENCES

1. Sasser S, Varghese M, Kellermann A, *et al.* Prehospital trauma care systems. Geneva: World Health Organization, 2005.
2. Waller A, Baker S, Szocka A. Childhood injury deaths: national analysis and geographic variations. *Am J Public Health* 1989;**79**:310-15.
3. Centers for Disease Control and Prevention. QuickStats: Percentage of injury deaths for which death was pronounced outside of a hospital, by leading mechanism of injury deaths: United States, 2005. *MMWR* 2008;**57**(41):1130.
4. RACS NZ Trauma Committee. Guidelines for a structured approach to the provision of optimal trauma care. Wellington: Ministry of Health, 1994.
5. Boersma E, Maas ACP, Deckers JW, *et al.* Early thrombolytic treatment in acute myocardial infarction: reappraisal of the golden hour. *Lancet* 1996;**348**:771-75.
6. Spiotta AM, Vargas J, Turner R, *et al.* The golden hour of stroke intervention: effect of thrombectomy procedural time in acute ischemic stroke on outcome. *J Neurol Interven Surg* 2014;**6**(7):511-16.
7. Branas CC, MacKenzie EJ, Williams JC, *et al.* Access to trauma centers in the United States. *JAMA* 2005;**293**(21):2626-33.
8. TraumaMaps.org Copyright 2006. University of Pennsylvania Cartographic Modeling Laboratory. 2006.
9. Carr BG, Bowman AJ, Wolff CS, *et al.* Disparities in access to trauma care in the United States: A population based analysis. *Injury, Int J Car Injured* 2017;**48**:332-38.
10. Hameed S, Schuurman N, Razek T, *et al.* Access to trauma systems in Canada. *J Trauma Acute Care Surg* 2010;**69**(6):1350-61.
11. Hsai R, Shen Y-C. Possible geographical barriers to trauma center access for vulnerable patients in the United States. *Arch Surg* 2011;**146**(1):46-52.

- 1  
2  
3 12. National Health Service. The NHS Atlas of Variation in Healthcare. *Reducing unwarranted*  
4 *variation to increase value and improve quality*. London: National Health Service, 2010.  
5  
6
- 7  
8 13. Statistics New Zealand. Population 2018 [Available from:  
9  
10 [http://archive.stats.govt.nz/browse\\_for\\_stats/government\\_finance/central\\_government/nz-in-the-](http://archive.stats.govt.nz/browse_for_stats/government_finance/central_government/nz-in-the-oecd/population.aspx)  
11 [oecd/population.aspx](http://archive.stats.govt.nz/browse_for_stats/government_finance/central_government/nz-in-the-oecd/population.aspx) (Accessed April 2018).  
12  
13
- 14  
15 14. Falconer JA. Preventability of pre-hospital trauma deaths in southern New Zealand. *NZMJ*  
16  
17 2010;**123**(1316):4159.  
18
- 19  
20 15. Grey C, Jackson R, Schmidt M, et al. One in four major ischaemic heart disease events are  
21 fatal and 60% are pre-hospital deaths: a national data-linkage study (ANZACS-QI 8) *Euro*  
22 *Heart J* 2017;**38**(3):172-80.  
23  
24
- 25  
26 16. Statistics New Zealand. Geographic boundary files Wellington: Statistics New Zealand;  
27 2015 [Available from: [www.stats.govt.nz\\browse-for-stats\\Maps-and-geography\\Geographic-](http://www.stats.govt.nz/browse-for-stats/Maps-and-geography/Geographic-areas/digital-boundary-files.aspx)  
28 [areas\\digital-boundary-files.aspx](http://www.stats.govt.nz/browse-for-stats/Maps-and-geography/Geographic-areas/digital-boundary-files.aspx)" (Accessed February 2017).  
29  
30  
31
- 32  
33 17. Lilley R, Kool B, Davie G, et al. Preventable injury deaths: identifying opportunities to  
34 improve timeliness and reach of emergency healthcare services in New Zealand. *Inj Prev*  
35 2017;Published Online First [9 February 2017]  
36  
37  
38
- 39  
40 18. Luxen d, Vetter C. *Real-time routing with OpenStreetMap data*. GIS'11 Proceedings of the  
41 19th ACM SIGSPATIAL International Conference on Advances in Geographic Information  
42 Systems; 2011; Chicago, Illinois.  
43  
44
- 45  
46 19. Gordon K, Swain A, Thirkell C, et al. The Wellington Life Flight Helicopter Emergency  
47 Medical Service (HEMS): a retrospective audit against new Ministry of Health criteria. *NZMJ*  
48 2014;**127**(1402):30-42.  
49  
50  
51
- 52  
53 20. Atkinson J, Salmond C, Crampton P. *NZDep2013 Index of Deprivation*. Wellington:  
54 University of Otago, 2014.  
55  
56  
57  
58  
59  
60

- 1  
2  
3 21. Emerson P, Dodds N, Green D, et al. Geographical access to critical care services in  
4 Scotland. *J Intens Care Soc* 2018;**19**(1):6-14.  
5  
6  
7 22. Statistics New Zealand. *New Zealand: An urban/rural profile*. Wellington: Statistics New  
8 Zealand, 2004.(Accessed February 2018)  
9  
10  
11 23. Ellison-Loschmann L, Pearce N. Improving access to health care among New Zealand's  
12 Maori population. *Am J Public Health* 2006;**96**(4):612-17.  
13  
14  
15 24. Nixon G, Samaranayaka A, de Graaf B, et al. Geographic disparities in the utilisation of  
16 computed tomography scanning services in southern New Zealand. *Health Policy*  
17 2014;**118**(2):222-28.  
18  
19  
20 25. Ministry of Health. *New Zealand Health Strategy future direction*. Wellington: Ministry of  
21 Health, 2016.  
22  
23  
24 26. Diaz M, Hendey G, Bivins H. When is the helicopter faster? A comparison of helicopter  
25 and ground ambulance transport times. *J Trauma Acute Care Surgery* 2005;**58**(1):148-53.  
26  
27  
28 27. Hankins D. Air medical transport of trauma patients. *Prehosp Emerg Care* 2006;**10**(3):324-  
29 27.  
30  
31  
32 28. Smith RM, Conn AKT. Prehospital care - scoop and run or stay and play. *Injury, Int J Care*  
33 *Injured* 2009;**40**(S4):S23-S26.  
34  
35  
36 29. Harmsen AMK, Giannakopoulos GF, Moerbeek PR, et al. The influence of prehospital  
37 time on trauma patients outcome: A systematic review. *Injury, Int J Care Injured* 2015;**46**:602-  
38 09.  
39  
40  
41 30. Brabyn L, Skelly C. Modeling population access to New Zealand public hospitals. *Int J*  
42 *Health Geograph* 2002;1(3).  
43  
44  
45  
46  
47  
48  
49  
50  
51  
52  
53  
54  
55  
56  
57  
58  
59  
60

**Table 1.** Categories of advanced levels of hospital care in New Zealand

| <b>Level of hospital care</b> | <b>Services provided</b>                                                                                                                                                   | <b>Hospital locations</b>         |
|-------------------------------|----------------------------------------------------------------------------------------------------------------------------------------------------------------------------|-----------------------------------|
| Level 1                       | Advanced trauma and medical services based around comprehensive intensive care units with specialist staff.                                                                | Main population areas             |
| Level 2                       | Capable of initial resuscitation and management. If specific intensive care not available then major trauma and severely ill patients transferred to Level 1 advanced care | Regional & rural provincial areas |
| Level 3                       | Run by non-specialist staff, capable of initial resuscitation. Major trauma and severely ill patients transferred to Level 1 advanced care.                                | Small rural areas                 |

**Table 2.** Overall population and sub-population access to advanced-level hospital care by road and helicopter EMS within specified time periods.

| Socio-demographic characteristics                 | Population frequency | Have access to Level 1 or 2 hospital care within each specified period |       |       |       |                 |
|---------------------------------------------------|----------------------|------------------------------------------------------------------------|-------|-------|-------|-----------------|
|                                                   |                      | Minutes (row %)                                                        |       |       |       |                 |
|                                                   |                      | Within 30                                                              | 30-45 | 45-60 | 60-90 | Greater than 90 |
| <b>Total Population</b>                           | 4240791              | 24                                                                     | 42    | 17    | 13    | 4               |
| Age (years)                                       |                      |                                                                        |       |       |       |                 |
| 0-14                                              | 849192               | 22                                                                     | 44    | 19    | 13    | 4               |
| 15-29                                             | 829182               | 32                                                                     | 41    | 15    | 10    | 3               |
| 30-44                                             | 812718               | 25                                                                     | 44    | 17    | 11    | 4               |
| 45-64                                             | 1065417              | 22                                                                     | 42    | 19    | 14    | 4               |
| ≥65                                               | 605793               | 22                                                                     | 40    | 18    | 17    | 4               |
| Sex                                               |                      |                                                                        |       |       |       |                 |
| Male                                              | 2061636              | 24                                                                     | 42    | 17    | 13    | 4               |
| Female                                            | 2176134              | 24                                                                     | 42    | 18    | 13    | 4               |
| Ethnicity*                                        |                      |                                                                        |       |       |       |                 |
| NZ European                                       | 2963721              | 22                                                                     | 40    | 19    | 15    | 3               |
| Māori                                             | 595170               | 23                                                                     | 36    | 19    | 17    | 4               |
| Pacific                                           | 295458               | 26                                                                     | 54    | 15    | 5     | 1               |
| Asian                                             | 470793               | 32                                                                     | 57    | 7     | 3     | 1               |
| MELAA                                             | 46905                | 31                                                                     | 52    | 9     | 5     | 2               |
| Other                                             | 67398                | 24                                                                     | 42    | 17    | 13    | 3               |
| Not Stated                                        | 235437               | 24                                                                     | 42    | 17    | 13    | 3               |
| NZ Dep Index                                      |                      |                                                                        |       |       |       |                 |
| 1-2 (least deprived)                              | 873393               | 14                                                                     | 54    | 21    | 7     | 4               |
| 3-4                                               | 85626                | 19                                                                     | 45    | 19    | 14    | 4               |
| 5-6                                               | 837558               | 24                                                                     | 39    | 17    | 17    | 4               |
| 7-8                                               | 829704               | 32                                                                     | 35    | 15    | 16    | 4               |
| 9-10 (most)                                       | 833169               | 32                                                                     | 36    | 15    | 13    | 4               |
| Population Density (persons per km <sup>2</sup> ) |                      |                                                                        |       |       |       |                 |
| High (20-<200,000)                                | 3859551              | 26                                                                     | 46    | 14    | 58    | 2               |
| Medium (2-<20)                                    | 303696               | 0.3                                                                    | 8     | 37    | 45    | 10              |
| Low (0-<2)                                        | 77544                | 0.015                                                                  | 1     | 14    | 57    | 27              |

\* Multiple ethnic identities possible in Census, therefore, ethnic categories will add up to more than the total population

**Table 3.** Usually resident population access to different levels of advanced-level hospital care by road and helicopter EMS within specified time periods

| Demographic characteristics                       | Level 1 hospital access<br>Within 60 minutes |            | Level 1 & 2 hospital access<br>Within 60 minutes |            |
|---------------------------------------------------|----------------------------------------------|------------|--------------------------------------------------|------------|
|                                                   | Row %                                        | 95% CI     | Row %                                            | 95% CI     |
| <b>TOTAL</b>                                      | 59.8                                         | 56.7, 62.9 | 84.6                                             | 82.2, 86.8 |
| Age (years)                                       |                                              |            |                                                  |            |
| 0-14                                              | 59.8                                         | 56.7, 62.8 | 84.3                                             | 81.8, 86.5 |
| 15-29                                             | 67.3                                         | 64.3, 70.2 | 88.0                                             | 85.8, 89.9 |
| 30-44                                             | 64.3                                         | 61.2, 67.2 | 86.1                                             | 83.8, 88.2 |
| 45-64                                             | 58.0                                         | 54.9, 61.1 | 82.6                                             | 80.1, 84.9 |
| 65+                                               | 50.7                                         | 47.6, 53.8 | 79.4                                             | 76.8, 81.9 |
| Sex                                               |                                              |            |                                                  |            |
| Male                                              | 59.7                                         | 56.6, 62.8 | 83.4                                             | 80.9, 85.7 |
| Female                                            | 59.9                                         | 56.8, 62.9 | 83.9                                             | 81.4, 86.1 |
| Ethnicity                                         |                                              |            |                                                  |            |
| New Zealand European                              | 55.3                                         | 52.2, 58.4 | 81.5                                             | 78.9, 83.9 |
| Māori                                             | 45.6                                         | 42.5, 48.7 | 78.7                                             | 76.0, 81.2 |
| Pacific                                           | 84.4                                         | 82.0, 86.6 | 94.7                                             | 93.1, 96.0 |
| Asian                                             | 87.4                                         | 85.1, 89.4 | 96.1                                             | 94.7, 97.2 |
| MELAA                                             | 82.9                                         | 80.4, 85.2 | 93.0                                             | 91.2, 94.5 |
| Other                                             | 52.7                                         | 49.6, 55.8 | 80.8                                             | 78.2, 83.2 |
| Not stated                                        | 59.9                                         | 56.8, 62.9 | 83.7                                             | 81.2, 85.9 |
| NZ Deprivation Index                              |                                              |            |                                                  |            |
| 1-2 (least deprived)                              | 73.4                                         | 70.5, 76.1 | 90.0                                             | 87.9, 91.8 |
| 3-4                                               | 62.0                                         | 58.9, 65.0 | 83.0                                             | 81.5, 85.3 |
| 5-6                                               | 54.9                                         | 51.8, 58.0 | 79.9                                             | 77.3, 82.3 |
| 7-8                                               | 53.9                                         | 50.8, 57.0 | 80.5                                             | 77.9, 82.9 |
| 9-10 (most deprived)                              | 55.1                                         | 51.9, 58.2 | 83.6                                             | 81.2, 85.8 |
| Population Density (persons per km <sup>2</sup> ) |                                              |            |                                                  |            |
| High (20-<200,000)                                | 64.3                                         | 61.2, 67.2 | 88.0                                             | 85.8, 89.9 |
| Medium (2-<20)                                    | 17.1                                         | 14.8, 19.6 | 45.3                                             | 42.2, 48.4 |
| Low (0-<2)                                        | 2.8                                          | 1.8, 4.0   | 15.2                                             | 13.0, 17.6 |



1  
2  
3 Figure 1 legend  
4

5 **Figure 1.** Access to advanced-level hospital care in New Zealand within 60 minutes. a:  
6

7 Population density. b: Road EMS coverage. c: Road or air EMS coverage.  
8  
9

10  
11  
12  
13  
14  
15  
16  
17  
18  
19  
20  
21  
22  
23  
24  
25  
26  
27  
28  
29  
30  
31  
32  
33  
34  
35  
36  
37  
38  
39  
40  
41  
42  
43  
44  
45  
46  
47  
48  
49  
50  
51  
52  
53  
54  
55  
56  
57  
58  
59  
60

For peer review only

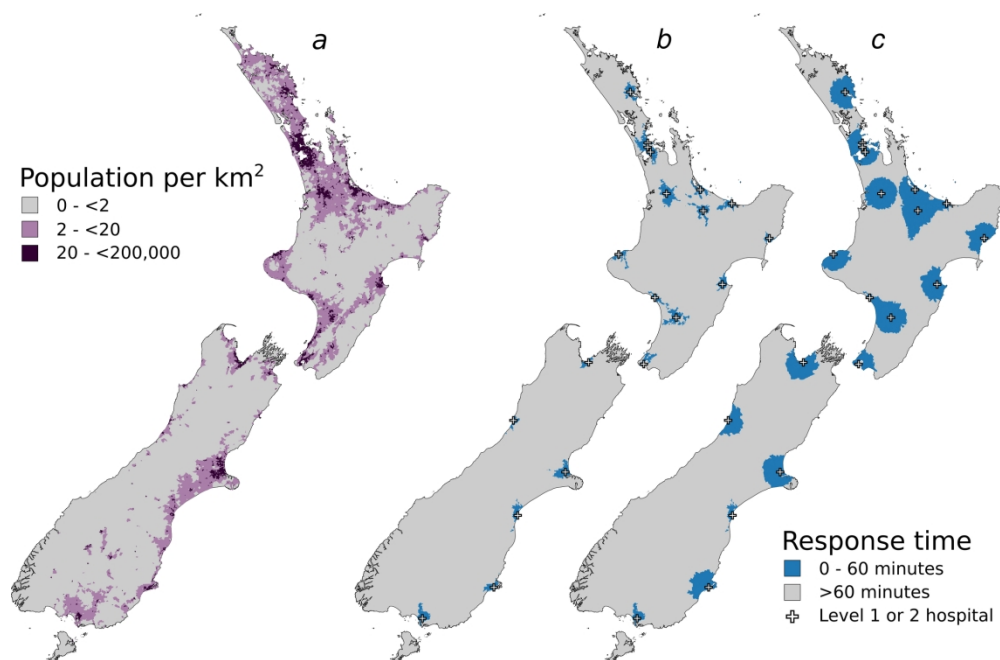

Figure 1. Access to advanced-level hospital care in New Zealand within 60 minutes. a: Population density. b: Road EMS coverage. c: Road or air EMS coverage.

196x127mm (300 x 300 DPI)

## STROBE Statement: checklist of items included in reports of observational studies

|                           | Item No | Recommendation                                                                                                                                                                                                                                                                                                                                                                                                                                                         | Check list |
|---------------------------|---------|------------------------------------------------------------------------------------------------------------------------------------------------------------------------------------------------------------------------------------------------------------------------------------------------------------------------------------------------------------------------------------------------------------------------------------------------------------------------|------------|
| <b>Title and abstract</b> | 1       | (a) Indicate the study's design with a commonly used term in the title or the abstract                                                                                                                                                                                                                                                                                                                                                                                 | YES        |
|                           |         | (b) Provide in the abstract an informative and balanced summary of what was done and what was found                                                                                                                                                                                                                                                                                                                                                                    | YES        |
| <b>Introduction</b>       |         |                                                                                                                                                                                                                                                                                                                                                                                                                                                                        |            |
| Background/rationale      | 2       | Explain the scientific background and rationale for the investigation being reported                                                                                                                                                                                                                                                                                                                                                                                   | YES        |
| Objectives                | 3       | State specific objectives, including any prespecified hypotheses                                                                                                                                                                                                                                                                                                                                                                                                       | YES        |
| <b>Methods</b>            |         |                                                                                                                                                                                                                                                                                                                                                                                                                                                                        |            |
| Study design              | 4       | Present key elements of study design early in the paper                                                                                                                                                                                                                                                                                                                                                                                                                | YES        |
| Setting                   | 5       | Describe the setting, locations, and relevant dates, including periods of recruitment, exposure, follow-up, and data collection                                                                                                                                                                                                                                                                                                                                        | YES        |
| Participants              | 6       | (a) <i>Cohort study</i> —Give the eligibility criteria, and the sources and methods of selection of participants. Describe methods of follow-up<br><i>Case-control study</i> —Give the eligibility criteria, and the sources and methods of case ascertainment and control selection. Give the rationale for the choice of cases and controls<br><i>Cross-sectional study</i> —Give the eligibility criteria, and the sources and methods of selection of participants | N/A        |
|                           |         | (b) <i>Cohort study</i> —For matched studies, give matching criteria and number of exposed and unexposed<br><i>Case-control study</i> —For matched studies, give matching criteria and the number of controls per case                                                                                                                                                                                                                                                 | N/A        |
| Variables                 | 7       | Clearly define all outcomes, exposures, predictors, potential confounders, and effect modifiers. Give diagnostic criteria, if applicable                                                                                                                                                                                                                                                                                                                               | YES        |
| Data sources/measurement  | 8*      | For each variable of interest, give sources of data and details of methods of assessment (measurement). Describe comparability of assessment methods if there is more than one group                                                                                                                                                                                                                                                                                   | YES        |
| Bias                      | 9       | Describe any efforts to address potential sources of bias                                                                                                                                                                                                                                                                                                                                                                                                              | YES        |
| Study size                | 10      | Explain how the study size was arrived at                                                                                                                                                                                                                                                                                                                                                                                                                              | N/A        |
| Quantitative variables    | 11      | Explain how quantitative variables were handled in the analyses. If applicable, describe which groupings were chosen and why                                                                                                                                                                                                                                                                                                                                           | YES        |
| Statistical methods       | 12      | (a) Describe all statistical methods, including control for confounding                                                                                                                                                                                                                                                                                                                                                                                                | YES        |
|                           |         | (b) Describe any methods used to examine subgroups and interactions                                                                                                                                                                                                                                                                                                                                                                                                    | YES        |
|                           |         | (c) Explain how missing data were addressed                                                                                                                                                                                                                                                                                                                                                                                                                            | N/A        |
|                           |         | (d) <i>Cohort study</i> —If applicable, explain how loss to follow-up was addressed<br><i>Case-control study</i> —If applicable, explain how matching of cases and controls was addressed<br><i>Cross-sectional study</i> —If applicable, describe analytical methods taking account of sampling strategy                                                                                                                                                              | N/A        |
|                           |         | (e) Describe any sensitivity analyses                                                                                                                                                                                                                                                                                                                                                                                                                                  | N/A        |

| <b>Results</b>           |     |                                                                                                                                                                                                              | <b>Check list</b> |
|--------------------------|-----|--------------------------------------------------------------------------------------------------------------------------------------------------------------------------------------------------------------|-------------------|
| Participants             | 13* | (a) Report numbers of individuals at each stage of study—eg numbers potentially eligible, examined for eligibility, confirmed eligible, included in the study, completing follow-up, and analysed            | N/A               |
|                          |     | (b) Give reasons for non-participation at each stage                                                                                                                                                         | N/A               |
|                          |     | (c) Consider use of a flow diagram                                                                                                                                                                           | N/A               |
| Descriptive data         | 14* | (a) Give characteristics of study participants (eg demographic, clinical, social) and information on exposures and potential confounders                                                                     | YES               |
|                          |     | (b) Indicate number of participants with missing data for each variable of interest                                                                                                                          | N/A               |
|                          |     | (c) <i>Cohort study</i> —Summarise follow-up time (eg, average and total amount)                                                                                                                             | N/A               |
| Outcome data             | 15* | <i>Cohort study</i> —Report numbers of outcome events or summary measures over time                                                                                                                          | N/A               |
|                          |     | <i>Case-control study</i> —Report numbers in each exposure category, or summary measures of exposure                                                                                                         | N/A               |
|                          |     | <i>Cross-sectional study</i> —Report numbers of outcome events or summary measures                                                                                                                           | YES               |
| Main results             | 16  | (a) Give unadjusted estimates and, if applicable, confounder-adjusted estimates and their precision (eg, 95% confidence interval). Make clear which confounders were adjusted for and why they were included | N/A               |
|                          |     | (b) Report category boundaries when continuous variables were categorized                                                                                                                                    | N/A               |
|                          |     | (c) If relevant, consider translating estimates of relative risk into absolute risk for a meaningful time period                                                                                             | N/A               |
| Other analyses           | 17  | Report other analyses done—eg analyses of subgroups and interactions, and sensitivity analyses                                                                                                               | YES               |
| <b>Discussion</b>        |     |                                                                                                                                                                                                              |                   |
| Key results              | 18  | Summarise key results with reference to study objectives                                                                                                                                                     | YES               |
| Limitations              | 19  | Discuss limitations of the study, taking into account sources of potential bias or imprecision. Discuss both direction and magnitude of any potential bias                                                   | YES               |
| Interpretation           | 20  | Give a cautious overall interpretation of results considering objectives, limitations, multiplicity of analyses, results from similar studies, and other relevant evidence                                   | YES               |
| Generalisability         | 21  | Discuss the generalisability (external validity) of the study results                                                                                                                                        | YES               |
| <b>Other information</b> |     |                                                                                                                                                                                                              |                   |
| Funding                  | 22  | Give the source of funding and the role of the funders for the present study and, if applicable, for the original study on which the present article is based                                                | YES               |

# BMJ Open

## Geographical and population disparities in timely access to prehospital and advanced level emergency care in New Zealand: a cross-sectional study

|                                 |                                                                                                                                                                                                                                                                                                                                                                                                                                                                                                                                                                                                                                                                                                                                                                                                                                                                                                           |
|---------------------------------|-----------------------------------------------------------------------------------------------------------------------------------------------------------------------------------------------------------------------------------------------------------------------------------------------------------------------------------------------------------------------------------------------------------------------------------------------------------------------------------------------------------------------------------------------------------------------------------------------------------------------------------------------------------------------------------------------------------------------------------------------------------------------------------------------------------------------------------------------------------------------------------------------------------|
| Journal:                        | <i>BMJ Open</i>                                                                                                                                                                                                                                                                                                                                                                                                                                                                                                                                                                                                                                                                                                                                                                                                                                                                                           |
| Manuscript ID                   | bmjopen-2018-026026.R2                                                                                                                                                                                                                                                                                                                                                                                                                                                                                                                                                                                                                                                                                                                                                                                                                                                                                    |
| Article Type:                   | Research                                                                                                                                                                                                                                                                                                                                                                                                                                                                                                                                                                                                                                                                                                                                                                                                                                                                                                  |
| Date Submitted by the Author:   | 20-Jun-2019                                                                                                                                                                                                                                                                                                                                                                                                                                                                                                                                                                                                                                                                                                                                                                                                                                                                                               |
| Complete List of Authors:       | Lilley, Rebecca; University of Otago Division of Health Sciences, Department of Preventive and Social Medicine<br>de Graaf, Brandon; University of Otago Division of Health Sciences, Department of Preventive and Social Medicine<br>Kool, Bridget; The University of Auckland, Section of Epidemiology and Biostatistics<br>Davie, Gabrielle; University of Otago Division of Health Sciences, Department of Preventive and Social Medicine<br>Reid, Papaarangi; University of Auckland, Te Kupenga Hauora Māori<br>Dicker, Bridget; Auckland University of Technology Faculty of Health and Environmental Sciences, Paramedicine<br>Civil, Ian; University of Auckland, Surgery; Auckland City Hospital, Trauma and Vascular Surgeon<br>Ameratunga, Shanthi; The University of Auckland, Section of Epidemiology and Biostatistics<br>Branas, Charles; Columbia University, Department of Epidemiology |
| <b>Primary Subject Heading</b>: | Public health                                                                                                                                                                                                                                                                                                                                                                                                                                                                                                                                                                                                                                                                                                                                                                                                                                                                                             |
| Secondary Subject Heading:      | Emergency medicine, Public health, Health services research                                                                                                                                                                                                                                                                                                                                                                                                                                                                                                                                                                                                                                                                                                                                                                                                                                               |
| Keywords:                       | geospatial analysis, PUBLIC HEALTH, Organisation of health services < HEALTH SERVICES ADMINISTRATION & MANAGEMENT, access to services, ACCIDENT & EMERGENCY MEDICINE                                                                                                                                                                                                                                                                                                                                                                                                                                                                                                                                                                                                                                                                                                                                      |
|                                 |                                                                                                                                                                                                                                                                                                                                                                                                                                                                                                                                                                                                                                                                                                                                                                                                                                                                                                           |

SCHOLARONE™  
Manuscripts

**Proposed paper title:** “*Geographical and population disparities in timely access to prehospital and advanced level emergency care in New Zealand: a cross-sectional study*”

Short: Disparities in access to prehospital trauma and medical care in NZ

**Authors & Affiliations:** Lilley R<sup>1</sup>, de Graaf B<sup>1</sup>, Kool B<sup>2</sup>, Davie G<sup>1</sup>, Reid P<sup>3</sup>, Dicker B<sup>4,5</sup>, Civil I<sup>6</sup>, Ameratunga S<sup>2</sup>, Branas CC<sup>7</sup>

1 - Injury Prevention Research Unit, Department of Preventive and Social Medicine, Dunedin School of Medicine, University of Otago, New Zealand; 2 – Section of Epidemiology and Biostatistics, School of Population Health, University of Auckland, New Zealand; 3 - Te Kupenga Hauora Māori, Faculty of Medical and Health Sciences, University of Auckland, New Zealand; 4 - Department of Paramedicine, Auckland University of Technology, Auckland, New Zealand; 5 - St John, Mt Wellington, Auckland, New Zealand; 6 – Trauma Services, Auckland District Health Board, Auckland, New Zealand; 7 - Department of Epidemiology, Columbia University Mailman School of Public Health, New York, United States of America.

**Corresponding author & present address:** Dr Rebecca Lilley, Injury Prevention Research Unit, Department of Preventive and Social Medicine, Dunedin School of Medicine, University of Otago, P.O. Box 56, Dunedin 9054, New Zealand.

Corresponding author e-mail address: rebecca.lilley@ipru.otago.ac.nz

**Author e-mail addresses:** rebecca.lilley@ipru.otago.ac.nz;  
brandon.degraaf@otago.ac.nz, b.kool@auckland.ac.nz, gabrielle.davie@otago.ac.nz;  
p.reid@auckland.ac.nz, IanC@adhb.govt.nz, Bridget.Dicker@stjohn.org.nz;  
s.ameratunga@auckland.ac.nz, c.branas@columbia.edu

Abstract word count 262; main body word count 3452; tables 3; figures 1 references 27

## ABSTRACT

**OBJECTIVE:** Rapid access to advanced emergency medical and trauma care has been shown to significantly reduce mortality and disability. This study aims to systematically examine geographical access to prehospital care provided by Emergency Medical Services (EMS) and advanced-level hospital care, for the smallest geographical units used in New Zealand and explores national disparities in geographical access to these services.

**DESIGN:** Observational study involving geospatial analysis estimating population access to EMS and advanced-level hospital care.

**SETTING:** Population access to advanced-level hospital care via road and air EMS across New Zealand.

**PARTICIPANTS:** New Zealand population usually resident within geographical Census meshblocks.

**PRIMARY AND SECONDARY OUTCOME MEASURES:** The proportion of the resident population with calculated EMS access to advanced-level hospital care within 60 minutes was examined by age, sex, ethnicity, level of deprivation, and population density to identify disparities in geographical access.

**RESULTS:** An estimated 16% of the New Zealand population does not have timely EMS access to advanced-level hospital care via road or air. The 700,000 New Zealanders without timely access lived mostly in areas of low-moderate population density. Indigenous Māori, New Zealand European and older New Zealanders were less likely to have timely access.

**CONCLUSIONS:** These findings suggest that in New Zealand, geographically marginalised groups which tend to be rural and remote communities with disproportionately more indigenous Māori and older adults have poorer EMS access to advanced-level hospitals. Addressing these inequities in rapid access to medical care may lead to improvements in survival that have been documented for people who experience medical or surgical emergencies.

**FUNDING:** Health Research Council of New Zealand (HRC 15/186)

**KEY WORDS:** Emergency Medical Services; Geospatial; GIS; Hospital; Health Services  
Access; Time-to-treatment

For peer review only

1  
2  
3  
4  
5  
6  
7  
8  
9  
10  
11  
12  
13  
14  
15  
16  
17  
18  
19  
20  
21  
22  
23  
24  
25  
26  
27  
28  
29  
30  
31  
32  
33  
34  
35  
36  
37  
38  
39  
40  
41  
42  
43  
44  
45  
46  
47  
48  
49  
50  
51  
52  
53  
54  
55  
56  
57  
58  
59  
60



## Article Summary

### Strengths and limitations of this study

This study is the first step in assessing access to emergency medical services (EMS) in New Zealand, a long, narrow and geographically challenging island nation in the South Pacific with a small, geographically dispersed population.

This study expands on previous international assessments of timely access to emergency hospital-level care by mapping exact locations of EMS response.

The choice of geospatial software and consciously conservative assumptions made are likely to underestimate the impact the access estimates presented.

The EMS scenario modelled in our analysis fits a theoretical “scoop & run” strategy to prehospital care, and does not consider other possible prehospital strategies, such as a differentiated strategy, or rapid delivery of specialist medical expertise to the patient.

## INTRODUCTION

Globally, millions of people with life-threatening injuries or health events require timely access to advanced healthcare services, including prehospital emergency services, to prevent needless mortality and morbidity.<sup>1</sup> The public health burden of time-critical medical emergencies can be further exacerbated in countries with challenging terrain, long travel distances, and dispersed populations, despite relative economic standing and available resources.<sup>2</sup> New Zealand is one country where these natural and population features are a daily challenge to the timely and equitable delivery of prehospital emergency care.

Death and disability due to acute medical emergencies can be significantly reduced by the timely provision of prehospital emergency healthcare, thereby presenting many opportunities for tertiary prevention. Optimal models of trauma care delivery, focusing on a continuum of timely emergency medical services (EMS) to efficient in-hospital care, start with the rapid provision of prehospital EMS, provide the best chance for survival and rehabilitation following injury.<sup>1 3 4</sup> A time sensitive approach has also been proven to benefit patients requiring EMS following cardiac, stroke and vascular events.<sup>5 6</sup>

EMS are a vital entry point into the continuum of acute emergency health care, as their primary role is to rapidly meet the emergency prehospital care needs of patients following time-critical injury or health events. In terms of receiving hospital-level treatment, the first hour, commonly referred to as the 'golden hour', is generally considered to be the most critical in terms of receiving definitive treatment for cases with time-critical injuries or health conditions.<sup>4</sup> Although not supported by a strong evidence-base, access to EMS and advanced-level hospital care is often judged against this threshold.<sup>7 8</sup> Disparities in timely access to advanced-level hospitals have been documented in numerous countries, identifying higher risk of delayed access for communities and vulnerable groups.<sup>7 9-12</sup>

New Zealand's mountainous terrain, long travel distances, and relatively small and geographically dispersed population of 4.2 million can severely hinder physical/transport access to advanced hospital-level care impacting timely and equitable delivery of prehospital EMS. New Zealand's population density is relatively low at 15 people per square kilometre, considerably less than countries with similar land area such as the United Kingdom with 243 people per square kilometre. Despite having low overall population density, New Zealand is highly urbanised, with 86% of the population living in urban areas.<sup>13</sup> Case reviews in New

1  
2  
3 Zealand suggest there are opportunities to improve prehospital EMS and reduce the number  
4 of prehospital deaths.<sup>14 15</sup>

6  
7 This study systematically examines geographical proximity and access to prehospital care  
8 provided by EMS and advanced-level hospital care, for the smallest geographical units used  
9 in New Zealand, in order to identify opportunities to improve survivability and reduce  
10 disability following time-critical medical emergencies, and explores national disparities in  
11 geographical access to these services.

## 16 17 **METHODS**

### 18 19 **Advanced level hospital care in New Zealand**

20  
21  
22 There are three levels of classification for New Zealand hospitals, relating to their capability  
23 to provide the appropriate services for seriously injured or ill patients (Table 1). New Zealand  
24 has a unique system where by trauma response, treatment, and rehabilitation are funded by  
25 the universal, no-fault, publicly funded Accident Compensation Corporation (ACC). In  
26 contrast, medical response, treatment and rehabilitation is publicly funded by each individual  
27 District Health Board with some part-charges for ambulance services.

### 28 29 **Data sources**

30  
31  
32 For this study we used Census 2013 (most recent publically available data) meshblock  
33 boundary and characteristics information available from Statistics New Zealand.<sup>16</sup>  
34  
35 Meshblocks are the smallest geographical unit available. In the 2013 census there were  
36 45,989 meshblocks ranging in size from part of a city block containing approximately 110  
37 people to a large area of rural land containing approximately 60 people. In addition to the  
38 boundary shapefiles, we obtained sociodemographic, deprivation and urbanity characteristics  
39 of the population usually residing within each meshblock.<sup>16</sup>

40  
41  
42 The physical addresses of advanced-level (Level 1 and 2) hospitals were converted to  
43 geographical longitude-latitude coordinates. The locations of road ambulance stations as at  
44 2014/15 were obtained from the two providers of these services in New Zealand, St. John  
45 Ambulance (New Zealand's major provider serving 98% of the population) and Wellington  
46 Free Ambulance. Air EMS services were restricted to helicopter based services in use in 2016  
47 and their longitude-latitude coordinates were derived from multiple sources, including the  
48 Civil Aviation Authority, the Hawkes Bay Rescue Helicopter Trust, and Google Maps. Road  
49  
50  
51  
52  
53  
54  
55  
56  
57  
58  
59  
60

1  
2  
3 network data was obtained from [www.geofabrik.de](http://www.geofabrik.de), an online open street map and spatial  
4 data provider.  
5

### 6 Geospatial access calculations 7

8  
9  
10 The continuous access times were categorised using relatively fine-grained (<30, 30-45, 45-  
11 60, 60-90,  $\geq 90$  minutes) categories for descriptive purposes and to ensure the use of the  
12 'golden hour' was sensible for the NZ population. Timely access was defined as the  
13 proportion of the population or land area from which an injured person was theoretically able  
14 to reach an advanced-level hospital within a given time of 60 minutes via air and road EMS.  
15 Access was calculated using established geospatial methods.<sup>7 17</sup> The time required for the  
16 nearest air or road EMS to reach the geometric centroid of a meshblock, stabilise a patient,  
17 and then direct travel to the nearest advanced-level receiving hospital was calculated for  
18 every meshblock.  
19  
20  
21  
22  
23  
24  
25

26 Road network travel times included the following assumption obtained from St Johns:  
27 immediate response and average road ambulance time at scene 14 minutes and 49 seconds.  
28 Road ambulance drive times were calculated using the Open Source Routing Machine  
29 (OSRM available at [www.project-osrm.org](http://www.project-osrm.org)). A detailed description on how spatial data are  
30 modelled in OSRM is available elsewhere.<sup>18</sup> All road calculations assumed ambulances drove  
31 at legal road speed, did not stop at intersections, driving conditions were ideal (i.e. no  
32 congestion), and ambulances drove the shortest route.  
33  
34  
35  
36  
37  
38

39 Air EMS travel times assumed helicopters flew in straight lines at an operational speed of  
40 182 km/hour, response time (preparation for lift-off) of 8 minutes, on scene time of 27  
41 minutes and 28 seconds, plus 32 seconds to find a safe pick-up landing site.<sup>19</sup> Air EMS flight  
42 times were calculated using custom written Python code running inside QGIS software.  
43  
44  
45  
46

### 47 Sociodemographic variables 48

49 Sociodemographic data on age, sex and ethnicity was obtained by summing the subtotal of  
50 each characteristic across all meshblocks, thus estimating the population of New Zealand at  
51 the time of the 2013 Census. Age was grouped into five categories: 0-14, 15-29, 30-44, 45-64  
52 and  $\geq 65$  years. The five categories of ethnicity used were: Māori (Indigenous population),  
53 Pacific, Asian, New Zealand European, and MELAA (Middle Eastern, Latin American,  
54 African) and Other. Census ethnicity data is not prioritised, with individuals able to record  
55  
56  
57  
58  
59  
60

1  
2  
3 multiple ethnicities, therefore all ethnicities reported are counted resulting in totals greater  
4 than 100%.  
5

6  
7 Deprivation was derived using the 2013 New Zealand Deprivation Index (NZDep), which  
8 aggregates and ranks communication, income, employment, family support, qualifications,  
9 home ownership, living space and transport within each meshblock area.<sup>20</sup> NZDep deciles  
10 were categorised into quintiles, with '1-2' representing the least deprived 20% and '9-10' the  
11 most deprived 20% of meshblocks in New Zealand. Population density within each  
12 meshblock area was calculated using number of usually resident people divided by  
13 meshblock area, grouped into three categories: high (20 to <200,000), medium (2 to <20) and  
14 low (0 to <2 persons per kilometre<sup>2</sup>).  
15  
16  
17  
18  
19  
20  
21

## 22 Statistical analyses

23  
24 Our unit of analysis was the 2013 Census meshblock. The count of usually resident  
25 populations within each Census 2013 meshblock was summed across the country to obtain  
26 national denominators. The sociodemographic, deprivation and urbanity characteristics of the  
27 population unable to access advanced-level care within key times are described using row  
28 percentages. Binomial exact 95% confidence intervals were calculated for row percentages  
29 using Stata version 13 SE.  
30  
31  
32  
33  
34  
35

36 A map of New Zealand was created to provide a visual representation of the areas within  
37 New Zealand that cannot access advanced-level hospital care via air and road EMS within 60  
38 minutes. Where both air and road were viable options, the shorter time by whatever means  
39 was chosen.  
40  
41  
42

## 43 Patient and public involvement.

44  
45 This study is a theoretical modelling geospatial analysis with no direct contact with study  
46 participants or patients or the public thus they were not involved in: 1) developing the  
47 research question and outcome measures; 2) planning the study design; and 3) the recruitment  
48 and conduct of the study. A study advisory group included patient and client representatives  
49 from SafeKids New Zealand, St Johns New Zealand, Pacifica Injury Prevention Aukilana  
50 (PIPA), Fire and Emergency New Zealand, Accident Compensation Corporation, and  
51 National Ambulance Sector Office. Dissemination of the study's findings will include  
52 meetings where patients/public and community groups engage, including the public health  
53 and injury prevention and control meetings.  
54  
55  
56  
57  
58  
59  
60

## Ethical Approval

Ethical approval for the broader programme of research<sup>17</sup>, of which this specific study is a part of, was obtained from the University of Auckland Human Participants Ethics Committee (ref 016179), National Coronial Information System (ref NZ007) and University of Otago Health and Disability Ethics Committee (ref OTA/90/02/008/AM05).

## RESULTS

Access to advanced-level hospital care by air or road EMS takes over 60 minutes for the majority (84%) of New Zealand's land area. While less than 16% of our land area allows emergency access via road or air (3.5% accessible by road only and 15% by air only) within 60 minutes, a substantial majority (83%) of New Zealanders live within those areas that do have timely access to advanced hospital level care within 60 minutes (Table 2). Close to one quarter (24%) of New Zealanders are estimated to have access to advanced-level hospital care within 30 minutes and two thirds (66%) within 45 minutes, 13% of the population are estimated to take up to 30 minutes longer than the 'golden hour' (i.e. within 60-90 minutes), and 4% are estimated to take greater than 90 minutes to access to advanced level hospital care.

Population differences in timely access were observed by ethnicity and population density. Persons identifying with the Asian ethnic group have the best estimated access to hospital level care, with only 0.78% residing in meshblocks greater than 90 minutes away from Level 1 or 2 hospital care. In contrast, those of Māori ethnicity had the poorest level of access with 4% living in meshblocks greater than 90 minutes away from advanced-level hospital care (difference in proportion 3.22%, 95% CI 2.19,4.48). With respect to population density, access was poorest for people usually residing in lower density areas meshblocks, with 27% of people usually resident in low density areas versus 2% of people usually resident in high density areas being greater than 90 minutes away from either Level 1 or 2 hospital care (difference in proportion 25%, 95% CI 22, 27).

Timely geographical access to our most advanced Level 1 hospital care is poorest for those aged 65 years or greater, those of Māori, New Zealand European, and Other ethnic groups, residents with high levels of deprivation, and those usually residing in the central North Island and lower South Island (Table 3). The addition of regional Level 2 hospital care significantly expands the catchment from 59.8% (95% CI 56.7, 62.9) of the population



1  
2  
3 residing in meshblocks with access to advanced-level hospital care (Level 1 and 2) within 60  
4 minutes to 84.6% (95% CI 82.2, 86.8) (Table 3). In terms of land area access this equates to  
5 5% (95% CI 4,7) of New Zealand's total land area with timely access to Level 1 hospital care  
6  
7 within 60 minutes, which increases to 16% (95% CI 14,18) with the addition of Level 2  
8  
9 hospital care (results not in table).

10  
11  
12 Sub-population differences exist in timely access observed by age, ethnicity, level of  
13 deprivation and population density (Table 3). The oldest New Zealanders (65+ year olds)  
14 have the least access to Level 1 (5.7%, 95% CI 47.6, 53.8) and combined Level 1 and 2  
15 hospital care (79.4%, 95% CI 76.8, 81.9). Less than half of the Māori population (45.6%,  
16 95% CI 42.5, 48.7) reside in geographical areas with timely access to Level 1 hospital care,  
17 increasing to 78.7% (95% CI 76.0, 81.2) with the inclusion of Level 2 hospital care, but still  
18 substantially lower than the Pacific, Asian and MELAA other ethnic groups. Geographical  
19 areas with timely theoretical access to hospital care have a high proportion of resident Asian,  
20 Pacific and MELAA ethnic groups. The proportion of the population with timely access to  
21 advanced-level hospital care declines with increasing levels of deprivation, the exception to  
22 this is the most deprived group (NZ Dep 9-10) for whom access increased slightly from the  
23 previous level of NZ Dep 7-8, reflecting many of highly deprived areas in New Zealand are  
24 located in main urban areas close to hospitals. Those residing in meshblock areas with the  
25 least deprivation have a substantially better degree of timely access. Regions with low to  
26 medium population density have the poorest access to prehospital care, with a paltry 2.8%  
27 (95% CI 1.8, 4.0) of those usually residing in areas of low population density having access  
28 to a Level 1 hospital, expanding to 15.2% (95% CI 13.0, 17.6) with the inclusion of Level 2  
29 care. No differences were observed by sex.

30  
31  
32 Figure 1 provides a visual representation of the catchment of air and road EMS given the  
33 placement of advanced-level hospitals and EMS bases. Comparing a) and c) provides some  
34 illustration of why timely access to usually resident population is high, but land area access is  
35 low. Timely access is clustered around the main highly populated areas with a population  
36 density in the range 20 to <200,000 people per kilometre. Air EMS services improve the level  
37 of timely access to advanced hospital level care above and beyond road EMS services in all  
38 areas except two in the lower South Island. However, much of the coverage is “doubled-up”  
39 as the combined road/air catchment closely follows the road only catchment. Many areas of  
40 moderate population density are not adequately covered by EMS, and the most isolated  
41 pockets of non-coverage are in areas with low population density.

## DISCUSSION

This research examined the proportion of the usually resident population with theoretical timely access to advanced-level hospital care by air and road EMS in New Zealand and identified important disparities in access to these prehospital services. Not surprisingly, timely access is clustered around areas of high population density based on where New Zealand's population usually resides. Applying the concept of the 'golden hour', we estimate 16% of the New Zealand population does not have timely theoretical access to advanced-level hospital care via road or air EMS. This equates to around 700,000 New Zealanders without timely access; particular disparities in theoretical timely access were observed for Māori, European New Zealanders, older New Zealanders and those residing in the lower South Island. Regionally based Level 2 hospital services are vital for rural communities to have timely access to care, particularly the Central North Island region where we estimate there is no timely access to the most advanced Level 1 hospital care within 60 minutes.

Previous international studies examining timely theoretical access to care following time-critical acute medical and trauma events have mainly focused on access to trauma services. Prehospital access to advanced trauma care in New Zealand is similar to that observed in the United States and Canada.<sup>7 9 10</sup> Timely access to advanced trauma care via road or air EMS was available to 88% of all United States residents, while 77% of Canadian residents have access via road ambulances.<sup>9 10</sup> Access to critical care services in Scotland is more comprehensive than New Zealand with 94% of the Scottish population within a 45 minute ambulance drive to definitive hospital-level care covering 47% of the Scottish landmass.<sup>21</sup> Unsurprisingly, the catchment of EMS and advanced-level hospital care aligns closely to population density in New Zealand, as also demonstrated in the United States, Canada and Scotland. Advanced-level hospital services are located to serve a large population base making the most efficient use of the resource and maintaining high levels of medical skill and management. This focus on areas of high population density, however, means that areas of disparities are generated on the basis of population density and dispersion. Areas of low to medium population density that have poorer EMS coverage typically have disproportionately greater indigenous Māori and ageing New Zealand European populations, high risk economic activity (such as farming and forestry), and remote areas of recreational and tourist activity.

Our study found important socio-demographic disparities in timely theoretical access for indigenous Māori, New Zealand Europeans, older New Zealanders and those residing in the



1  
2  
3 southern part of the South Island, reflecting the geographical spread of New Zealand's  
4 population. While most Māori live in urban areas, Māori make up a higher proportion of the  
5 population residing in highly rural and remote areas, by contrast almost all Pacific and the  
6 majority of Asian people in New Zealand live in urban areas.<sup>22</sup> Older New Zealanders, who  
7 are typically New Zealand European, contribute to a high proportion of those who live in  
8 rural areas with low to moderate urban influence, explaining the longer theoretical access  
9 times observed for this group. Regions with low to moderate population density stood out as  
10 being significantly underserved when compared with areas of high population density.  
11 Similar disparities in access to advanced-level hospital care have been reported  
12 internationally for those residing in rural areas or very remote areas, and for ethnic  
13 minorities.<sup>7-9-11 21</sup> Our study provides further evidence of disparities in timely theoretical  
14 access to healthcare for Māori and for rural communities, and the unequal distribution of  
15 healthcare resources across New Zealand providing a further pathway for health disparities  
16 for Māori and rural populations: difficulties in achieved access to healthcare for these sub-  
17 groups are already well documented.<sup>23 24</sup> Our results add further support for EMS and  
18 advanced-level hospital services to be optimally configured to address both the geospatial and  
19 socio-demographic challenges of timely access relative to population density in New  
20 Zealand.

21  
22  
23  
24  
25  
26  
27  
28  
29  
30  
31  
32  
33  
34  
35 The optimal placement or enhancement of EMS retrieval and transfer services and advanced  
36 healthcare facilities in New Zealand should be examined further. One of the guiding  
37 principles for New Zealand's health system is that all New Zealanders have "timely and  
38 equitable access" to a "comprehensive range of health and disability services".<sup>25</sup> Our study  
39 found concerning geospatial disparities in timely geographical access for communities with  
40 low to moderate population density which tend to be rural and remote communities with  
41 disproportionately more Māori and older New Zealand Europeans. Furthermore areas with  
42 few permanent residents are popular destinations for international and residential tourists  
43 traveling to, and engaging in, outdoor tourist pursuits in remote back country and alpine  
44 areas. We have identified the need for the combined reach of EMS services and advanced-  
45 level hospital care to consider coverage of socio-demographic and geospatial aspects beyond  
46 just high density residential population bases.

47  
48  
49  
50  
51  
52  
53  
54  
55  
56  
57 Understanding the geospatial distribution of EMS services and timely access into advanced-  
58 level hospital care is the first step in identifying opportunities for improved care and planning  
59 of future services and health policy in the prehospital setting of an advanced trauma and  
60

1  
2  
3 medical system. It is unknown if this current level of under-service results in higher rates of  
4 mortality across New Zealand, and future analyses from this research team will examine this  
5 question further with regard to injury.<sup>17</sup> Geographical areas with limited prehospital air and  
6 road EMS may be adequately served by other groups of appropriated trained first responders,  
7 such as General Practitioners, Police and Fire Services, where they sit outside of existing  
8 EMS catchment areas. Future research should examine the location of other first responders  
9 and the expansion of coverage of EMS these groups potentially provide. Other approaches to  
10 extending access to EMS and advanced-level hospital care include increasing, upgrading or  
11 integrating the roles of regional Level 3 hospitals in the provision of emergency care;  
12 expanding helicopter provision, repositioning existing road or air EMS depots, or providing  
13 novel methods such as delivery of advanced care to critically injured patients or telemedicine  
14 interventions.<sup>7 10</sup>

15  
16  
17  
18  
19  
20  
21  
22  
23  
24  
25 This study has a number of limitations. The choice of geospatial software and assumptions  
26 made are likely to impact the theoretical access estimates presented; we have consciously  
27 chosen conservative assumptions and settings meaning the proportion without timely access  
28 is likely to be underestimated. This analysis also assumes simultaneous dispatch by road and  
29 air EMS services, however the operational reality is that air response can take longer when  
30 emergency first responders are required to assess severity of an acute event prior to helicopter  
31 dispatch. It also assumes the availability of suitable helicopter landing sites at the meshblock  
32 centroid which may not be available. The benefits of the extended air ambulance coverage  
33 identified in our analysis would therefore only be achieved if air ambulance services were  
34 dispatched without delay and if suitable helicopter landing sites were available. Early/  
35 simultaneous activation models have shown clear benefits for prevention of needless deaths.<sup>26</sup>

36  
37  
38  
39  
40  
41  
42  
43  
44  
45  
46  
47  
48  
49  
50  
51  
52  
53  
54  
55  
56  
57  
58  
59  
60  
27 A further limitation is that the EMS scenario theoretically modelled in our analysis fits a  
“scoop & run” strategy to prehospital care, and does not consider other possible regional or  
local prehospital and EMS strategies, such as a differentiated strategy, or rapid delivery of  
specialist medical expertise to the patient.<sup>28</sup> Recent empirical evidence suggests that a  
prehospital strategy should differentiate by injury type, with the worst case scenario injuries  
involving penetrating haemodynamically unstable injury or neurological trauma needing to  
reach advanced care as quickly as possible to have the best chance of survival.<sup>29</sup> The use of  
centroids may have led to geographic selection bias when a meshblock sits on edge of the  
time boundary, yet the centroid sits outside this boundary and is not selected. The potential  
for geographic selection bias is thought to be balanced out by the inclusion of similar sized

1  
2  
3 meshblock's in close proximity with partial coverage over a time boundary where the  
4 centroid sits inside the boundary. Manual review of the 1044 large, remote meshblocks  
5 where the centroid was 10 km, or greater, from the nearest road revealed no part of these area  
6 units was reachable by air or road EMS within the time-limits examined.  
7  
8  
9

10  
11 Our study expands on previous geospatial examinations of access in New Zealand<sup>30</sup> and  
12 internationally<sup>7 10 21</sup> with the use of actual location of road and air based EMS services, with  
13 comparison to usually resident population densities, to assess the actual level of EMS  
14 coverage and response providing valuable geospatial analyses to inform future planning and  
15 expansion of prehospital EMS in New Zealand. As New Zealand is an island nation with a  
16 universal nationally funded health care system we are able to consider the closest hospital  
17 care without being restricted by State, Provincial or National funding boundaries, unlike  
18 some international studies.  
19  
20  
21  
22  
23  
24

## 25 **Conclusion**

26  
27  
28 Timely access to advanced-level hospital care is important to increase survival from time-  
29 critical acute injury and medical events. Our study highlights the need for planning of EMS  
30 coverage in New Zealand, especially for areas of moderate to low population density, in order  
31 to address inequities with regard to timely access to advanced-level hospital care. The  
32 geographical configuration of EMS and healthcare systems is important for optimising  
33 accessibility to services and promoting the efficient use of scarce resources in a  
34 geographically challenging island nation. Future analyses will examine if disparities in timely  
35 access to advanced-level hospital care translates into higher rates of mortality due to time  
36 critical injuries in New Zealand and identify areas requiring improved access to EMS and  
37 advanced-level hospital care relative to the burden of prehospital fatal injury.<sup>17</sup>  
38  
39  
40  
41  
42  
43  
44  
45  
46  
47  
48  
49  
50  
51  
52  
53  
54  
55  
56  
57  
58  
59  
60

## Acknowledgements

The authors would like to thank Ian Wilmot (Wilmot Consulting), and staff of the St John, Wellington Free Ambulance and Ministry of Health for supplying data integral to our geospatial analyses.

## Author contributors

R.L. contributed to the study design, conducted the literature review, provided oversight of the spatial analysis and was primarily responsible for the article preparation. B.dG. was primarily responsible for acquiring data and the spatial analysis, as well as contributing to the interpretation of data and preparation of the paper. G.D. contributed to the study design, provided advice on the spatial analysis methods, overseeing the spatial analysis and contributed to the interpretation of data and preparation of the paper. B.K. contributed to the study design, provided oversight of the project, interpretation of results and article preparation. C.B. contributed to the study design, provided advice on the spatial analysis methods and contributed to the direction of the analysis and interpretation of data and preparation of the paper. P.R., S.A, I.C., & B.D. contributed to the study design and to the interpretation of data and preparation of the paper.

## Funding

This research was funded by the Health Research Council of New Zealand project grant (HRC Grant 15/186).

## Competing Interests

The authors have no competing interests to declare.

## Patient consent

Patient level data was not utilised in this study.

## Ethics approval

Ethical approval for the broader programme of research<sup>17</sup>, of which this specific study is a part of, was obtained from the University of Auckland Human Participants Ethics Committee (ref 016179), National Coronial Information System (ref NZ007) and University of Otago Health and Disability Ethics Committee (ref OTA/90/02/008/AM05).

## Data sharing statement

1  
2  
3 Data are available from the corresponding author and access to these data will be considered  
4 on a case-by-case basis.  
5  
6  
7  
8  
9  
10  
11  
12  
13  
14  
15  
16  
17  
18  
19  
20  
21  
22  
23  
24  
25  
26  
27  
28  
29  
30  
31  
32  
33  
34  
35  
36  
37  
38  
39  
40  
41  
42  
43  
44  
45  
46  
47  
48  
49  
50  
51  
52  
53  
54  
55  
56  
57  
58  
59  
60

For peer review only

## REFERENCES

1. Sasser S, Varghese M, Kellermann A, *et al.* Prehospital trauma care systems. Geneva: World Health Organization, 2005.
2. Waller A, Baker S, Szocka A. Childhood injury deaths: national analysis and geographic variations. *Am J Public Health* 1989;**79**:310-15.
3. Centers for Disease Control and Prevention. QuickStats: Percentage of injury deaths for which death was pronounced outside of a hospital, by leading mechanism of injury deaths: United States, 2005. *MMWR* 2008;**57**(41):1130.
4. RACS NZ Trauma Committee. Guidelines for a structured approach to the provision of optimal trauma care. Wellington: Ministry of Health, 1994.
5. Boersma E, Maas ACP, Deckers JW, *et al.* Early thrombolytic treatment in acute myocardial infarction: reappraisal of the golden hour. *Lancet* 1996;**348**:771-75.
6. Spiotta AM, Vargas J, Turner R, *et al.* The golden hour of stroke intervention: effect of thrombectomy procedural time in acute ischemic stroke on outcome. *J Neurol Interven Surg* 2014;**6**(7):511-16.
7. Branas CC, MacKenzie EJ, Williams JC, *et al.* Access to trauma centers in the United States. *JAMA* 2005;**293**(21):2626-33.
8. TraumaMaps.org Copyright 2006. University of Pennsylvania Cartographic Modeling Laboratory. 2006.
9. Carr BG, Bowman AJ, Wolff CS, *et al.* Disparities in access to trauma care in the United States: A population based analysis. *Injury, Int J Car Injured* 2017;**48**:332-38.
10. Hameed S, Schuurman N, Razek T, *et al.* Access to trauma systems in Canada. *J Trauma Acute Care Surg* 2010;**69**(6):1350-61.
11. Hsai R, Shen Y-C. Possible geographical barriers to trauma center access for vulnerable patients in the United States. *Arch Surg* 2011;**146**(1):46-52.

12. National Health Service. The NHS Atlas of Variation in Healthcare. *Reducing unwarranted variation to increase value and improve quality*. London: National Health Service, 2010.
13. Statistics New Zealand. Population 2018 [Available from: [http://archive.stats.govt.nz/browse\\_for\\_stats/government\\_finance/central\\_government/nz-in-the-oecd/population.aspx](http://archive.stats.govt.nz/browse_for_stats/government_finance/central_government/nz-in-the-oecd/population.aspx) (Accessed April 2018).
14. Falconer JA. Preventability of pre-hospital trauma deaths in southern New Zealand. *NZMJ* 2010;**123**(1316):4159.
15. Grey C, Jackson R, Schmidt M, et al. One in four major ischaemic heart disease events are fatal and 60% are pre-hospital deaths: a national data-linkage study (ANZACS-QI 8) *Euro Heart J* 2017;**38**(3):172-80.
16. Statistics New Zealand. Geographic boundary files Wellington: Statistics New Zealand; 2015 [Available from: [www.stats.govt.nz/browse-for-stats/Maps-and-geography/Geographic-areas/digital-boundary-files.aspx](http://www.stats.govt.nz/browse-for-stats/Maps-and-geography/Geographic-areas/digital-boundary-files.aspx)] (Accessed February 2017).
17. Lilley R, Kool B, Davie G, et al. Preventable injury deaths: identifying opportunities to improve timeliness and reach of emergency healthcare services in New Zealand. *Inj Prev* 2017; Published Online First [9 February 2017]
18. Luxen d, Vetter C. *Real-time routing with OpenStreetMap data*. GIS'11 Proceedings of the 19th ACM SIGSPATIAL International Conference on Advances in Geographic Information Systems; 2011; Chicago, Illinois.
19. Gordon K, Swain A, Thirkell C, et al. The Wellington Life Flight Helicopter Emergency Medical Service (HEMS): a retrospective audit against new Ministry of Health criteria. *NZMJ* 2014;**127**(1402):30-42.
20. Atkinson J, Salmond C, Crampton P. *NZDep2013 Index of Deprivation*. Wellington: University of Otago, 2014.

- 1  
2  
3 21. Emerson P, Dodds N, Green D, et al. Geographical access to critical care services in  
4 Scotland. *J Intens Care Soc* 2018;**19**(1):6-14.  
5  
6  
7 22. Statistics New Zealand. *New Zealand: An urban/rural profile*. Wellington: Statistics New  
8 Zealand, 2004.(Accessed February 2018)  
9  
10 23. Ellison-Loschmann L, Pearce N. Improving access to health care among New Zealand's  
11 Maori population. *Am J Public Health* 2006;**96**(4):612-17.  
12  
13 24. Nixon G, Samaranayaka A, de Graaf B, et al. Geographic disparities in the utilisation of  
14 computed tomography scanning services in southern New Zealand. *Health Policy*  
15 2014;**118**(2):222-28.  
16  
17 25. Ministry of Health. *New Zealand Health Strategy future direction*. Wellington: Ministry of  
18 Health, 2016.  
19  
20 26. Diaz M, Hendey G, Bivins H. When is the helicopter faster? A comparison of helicopter  
21 and ground ambulance transport times. *J Trauma Acute Care Surgery* 2005;**58**(1):148-53.  
22  
23 27. Hankins D. Air medical transport of trauma patients. *Prehosp Emerg Care* 2006;**10**(3):324-  
24 27.  
25  
26 28. Smith RM, Conn AKT. Prehospital care - scoop and run or stay and play. *Injury, Int J Care*  
27 *Injured* 2009;**40**(S4):S23-S26.  
28  
29 29. Harmsen AMK, Giannakopoulos GF, Moerbeek PR, et al. The influence of prehospital  
30 time on trauma patients outcome: A systematic review. *Injury, Int J Care Injured* 2015;**46**:602-  
31 09.  
32  
33 30. Brabyn L, Skelly C. Modeling population access to New Zealand public hospitals. *Int J*  
34 *Health Geograph* 2002;1(3).  
35  
36  
37  
38  
39  
40  
41  
42  
43  
44  
45  
46  
47  
48  
49  
50  
51  
52  
53  
54  
55  
56  
57  
58  
59  
60



**Table 1.** Categories of advanced levels of hospital care in New Zealand

| <b>Level of hospital care</b> | <b>Services provided</b>                                                                                                                                                   | <b>Hospital locations</b>         |
|-------------------------------|----------------------------------------------------------------------------------------------------------------------------------------------------------------------------|-----------------------------------|
| Level 1                       | Advanced trauma and medical services based around comprehensive intensive care units with specialist staff.                                                                | Main population areas             |
| Level 2                       | Capable of initial resuscitation and management. If specific intensive care not available then major trauma and severely ill patients transferred to Level 1 advanced care | Regional & rural provincial areas |
| Level 3                       | Run by non-specialist staff, capable of initial resuscitation. Major trauma and severely ill patients transferred to Level 1 advanced care.                                | Small rural areas                 |

**Table 2.** Overall population and sub-population access to advanced-level hospital care by road and helicopter EMS within specified time periods.

| Socio-demographic characteristics                 | Population frequency | Have access to Level 1 or 2 hospital care within each specified period |       |       |       |                 |
|---------------------------------------------------|----------------------|------------------------------------------------------------------------|-------|-------|-------|-----------------|
|                                                   |                      | Minutes (row %)                                                        |       |       |       |                 |
|                                                   |                      | Within 30                                                              | 30-45 | 45-60 | 60-90 | Greater than 90 |
| <b>Total Population</b>                           | 4240791              | 24                                                                     | 42    | 17    | 13    | 4               |
| Age (years)                                       |                      |                                                                        |       |       |       |                 |
| 0-14                                              | 849192               | 22                                                                     | 44    | 19    | 13    | 4               |
| 15-29                                             | 829182               | 32                                                                     | 41    | 15    | 10    | 3               |
| 30-44                                             | 812718               | 25                                                                     | 44    | 17    | 11    | 4               |
| 45-64                                             | 1065417              | 22                                                                     | 42    | 19    | 14    | 4               |
| ≥65                                               | 605793               | 22                                                                     | 40    | 18    | 17    | 4               |
| Sex                                               |                      |                                                                        |       |       |       |                 |
| Male                                              | 2061636              | 24                                                                     | 42    | 17    | 13    | 4               |
| Female                                            | 2176134              | 24                                                                     | 42    | 18    | 13    | 4               |
| Ethnicity*                                        |                      |                                                                        |       |       |       |                 |
| NZ European                                       | 2963721              | 22                                                                     | 40    | 19    | 15    | 3               |
| Māori                                             | 595170               | 23                                                                     | 36    | 19    | 17    | 4               |
| Pacific                                           | 295458               | 26                                                                     | 54    | 15    | 5     | 1               |
| Asian                                             | 470793               | 32                                                                     | 57    | 7     | 3     | 1               |
| MELAA                                             | 46905                | 31                                                                     | 52    | 9     | 5     | 2               |
| Other                                             | 67398                | 24                                                                     | 42    | 17    | 13    | 3               |
| Not Stated                                        | 235437               | 24                                                                     | 42    | 17    | 13    | 3               |
| NZ Dep Index                                      |                      |                                                                        |       |       |       |                 |
| 1-2 (least deprived)                              | 873393               | 14                                                                     | 54    | 21    | 7     | 4               |
| 3-4                                               | 85626                | 19                                                                     | 45    | 19    | 14    | 4               |
| 5-6                                               | 837558               | 24                                                                     | 39    | 17    | 17    | 4               |
| 7-8                                               | 829704               | 32                                                                     | 35    | 15    | 16    | 4               |
| 9-10 (most)                                       | 833169               | 32                                                                     | 36    | 15    | 13    | 4               |
| Population Density (persons per km <sup>2</sup> ) |                      |                                                                        |       |       |       |                 |
| High (20-<200,000)                                | 3859551              | 26                                                                     | 46    | 14    | 58    | 2               |
| Medium (2-<20)                                    | 303696               | 0.3                                                                    | 8     | 37    | 45    | 10              |
| Low (0-<2)                                        | 77544                | 0.015                                                                  | 1     | 14    | 57    | 27              |

\* Multiple ethnic identities possible in Census, therefore, ethnic categories will add up to more than the total population

**Table 3.** Usually resident population access to different levels of advanced-level hospital care by road and helicopter EMS within specified time periods

| Demographic characteristics                       | Level 1 hospital access<br>Within 60 minutes |            | Level 1 & 2 hospital access<br>Within 60 minutes |            |
|---------------------------------------------------|----------------------------------------------|------------|--------------------------------------------------|------------|
|                                                   | Row %                                        | 95% CI     | Row %                                            | 95% CI     |
| <b>TOTAL</b>                                      | 59.8                                         | 56.7, 62.9 | 84.6                                             | 82.2, 86.8 |
| Age (years)                                       |                                              |            |                                                  |            |
| 0-14                                              | 59.8                                         | 56.7, 62.8 | 84.3                                             | 81.8, 86.5 |
| 15-29                                             | 67.3                                         | 64.3, 70.2 | 88.0                                             | 85.8, 89.9 |
| 30-44                                             | 64.3                                         | 61.2, 67.2 | 86.1                                             | 83.8, 88.2 |
| 45-64                                             | 58.0                                         | 54.9, 61.1 | 82.6                                             | 80.1, 84.9 |
| 65+                                               | 50.7                                         | 47.6, 53.8 | 79.4                                             | 76.8, 81.9 |
| Sex                                               |                                              |            |                                                  |            |
| Male                                              | 59.7                                         | 56.6, 62.8 | 83.4                                             | 80.9, 85.7 |
| Female                                            | 59.9                                         | 56.8, 62.9 | 83.9                                             | 81.4, 86.1 |
| Ethnicity                                         |                                              |            |                                                  |            |
| New Zealand European                              | 55.3                                         | 52.2, 58.4 | 81.5                                             | 78.9, 83.9 |
| Māori                                             | 45.6                                         | 42.5, 48.7 | 78.7                                             | 76.0, 81.2 |
| Pacific                                           | 84.4                                         | 82.0, 86.6 | 94.7                                             | 93.1, 96.0 |
| Asian                                             | 87.4                                         | 85.1, 89.4 | 96.1                                             | 94.7, 97.2 |
| MELAA                                             | 82.9                                         | 80.4, 85.2 | 93.0                                             | 91.2, 94.5 |
| Other                                             | 52.7                                         | 49.6, 55.8 | 80.8                                             | 78.2, 83.2 |
| Not stated                                        | 59.9                                         | 56.8, 62.9 | 83.7                                             | 81.2, 85.9 |
| NZ Deprivation Index                              |                                              |            |                                                  |            |
| 1-2 (least deprived)                              | 73.4                                         | 70.5, 76.1 | 90.0                                             | 87.9, 91.8 |
| 3-4                                               | 62.0                                         | 58.9, 65.0 | 83.0                                             | 81.5, 85.3 |
| 5-6                                               | 54.9                                         | 51.8, 58.0 | 79.9                                             | 77.3, 82.3 |
| 7-8                                               | 53.9                                         | 50.8, 57.0 | 80.5                                             | 77.9, 82.9 |
| 9-10 (most deprived)                              | 55.1                                         | 51.9, 58.2 | 83.6                                             | 81.2, 85.8 |
| Population Density (persons per km <sup>2</sup> ) |                                              |            |                                                  |            |
| High (20-<200,000)                                | 64.3                                         | 61.2, 67.2 | 88.0                                             | 85.8, 89.9 |
| Medium (2-<20)                                    | 17.1                                         | 14.8, 19.6 | 45.3                                             | 42.2, 48.4 |
| Low (0-<2)                                        | 2.8                                          | 1.8, 4.0   | 15.2                                             | 13.0, 17.6 |

1  
2  
3 Figure 1 legend  
4

5 **Figure 1.** Access to advanced-level hospital care in New Zealand within 60 minutes. a:  
6

7 Population density. b: Road EMS coverage. c: Road or air EMS coverage.  
8  
9  
10  
11  
12  
13  
14  
15  
16  
17  
18  
19  
20  
21  
22  
23  
24  
25  
26  
27  
28  
29  
30  
31  
32  
33  
34  
35  
36  
37  
38  
39  
40  
41  
42  
43  
44  
45  
46  
47  
48  
49  
50  
51  
52  
53  
54  
55  
56  
57  
58  
59  
60

For peer review only



Figure 1. Access to advanced-level hospital care in New Zealand within 60 minutes. a: Population density. b: Road EMS coverage. c: Road or air EMS coverage.

196x127mm (300 x 300 DPI)

## STROBE Statement: checklist of items included in reports of observational studies

|                           | Item No | Recommendation                                                                                                                                                                                                                                                                                                                                                                                                                                                         | Check list |
|---------------------------|---------|------------------------------------------------------------------------------------------------------------------------------------------------------------------------------------------------------------------------------------------------------------------------------------------------------------------------------------------------------------------------------------------------------------------------------------------------------------------------|------------|
| <b>Title and abstract</b> | 1       | (a) Indicate the study's design with a commonly used term in the title or the abstract                                                                                                                                                                                                                                                                                                                                                                                 | Yes        |
|                           |         | (b) Provide in the abstract an informative and balanced summary of what was done and what was found                                                                                                                                                                                                                                                                                                                                                                    | Yes        |
| <b>Introduction</b>       |         |                                                                                                                                                                                                                                                                                                                                                                                                                                                                        |            |
| Background/rationale      | 2       | Explain the scientific background and rationale for the investigation being reported                                                                                                                                                                                                                                                                                                                                                                                   | Yes p5-6   |
| Objectives                | 3       | State specific objectives, including any prespecified hypotheses                                                                                                                                                                                                                                                                                                                                                                                                       | Yes p6     |
| <b>Methods</b>            |         |                                                                                                                                                                                                                                                                                                                                                                                                                                                                        |            |
| Study design              | 4       | Present key elements of study design early in the paper                                                                                                                                                                                                                                                                                                                                                                                                                | Yes p6-8   |
| Setting                   | 5       | Describe the setting, locations, and relevant dates, including periods of recruitment, exposure, follow-up, and data collection                                                                                                                                                                                                                                                                                                                                        | Yes p6-8   |
| Participants              | 6       | (a) <i>Cohort study</i> —Give the eligibility criteria, and the sources and methods of selection of participants. Describe methods of follow-up<br><i>Case-control study</i> —Give the eligibility criteria, and the sources and methods of case ascertainment and control selection. Give the rationale for the choice of cases and controls<br><i>Cross-sectional study</i> —Give the eligibility criteria, and the sources and methods of selection of participants | N/A        |
|                           |         | (b) <i>Cohort study</i> —For matched studies, give matching criteria and number of exposed and unexposed<br><i>Case-control study</i> —For matched studies, give matching criteria and the number of controls per case                                                                                                                                                                                                                                                 | N/A        |
| Variables                 | 7       | Clearly define all outcomes, exposures, predictors, potential confounders, and effect modifiers. Give diagnostic criteria, if applicable                                                                                                                                                                                                                                                                                                                               | Y p6-8     |
| Data sources/measurement  | 8*      | For each variable of interest, give sources of data and details of methods of assessment (measurement). Describe comparability of assessment methods if there is more than one group                                                                                                                                                                                                                                                                                   | Y p6-8     |
| Bias                      | 9       | Describe any efforts to address potential sources of bias                                                                                                                                                                                                                                                                                                                                                                                                              | Y p6-8     |
| Study size                | 10      | Explain how the study size was arrived at                                                                                                                                                                                                                                                                                                                                                                                                                              | N/A        |
| Quantitative variables    | 11      | Explain how quantitative variables were handled in the analyses. If applicable, describe which groupings were chosen and why                                                                                                                                                                                                                                                                                                                                           | Y p8       |
| Statistical methods       | 12      | (a) Describe all statistical methods, including control for confounding                                                                                                                                                                                                                                                                                                                                                                                                | Y p8       |
|                           |         | (b) Describe any methods used to examine subgroups and interactions                                                                                                                                                                                                                                                                                                                                                                                                    | Y p8       |
|                           |         | (c) Explain how missing data were addressed                                                                                                                                                                                                                                                                                                                                                                                                                            | N/A        |
|                           |         | (d) <i>Cohort study</i> —If applicable, explain how loss to follow-up was addressed<br><i>Case-control study</i> —If applicable, explain how matching of cases and controls was addressed<br><i>Cross-sectional study</i> —If applicable, describe analytical methods taking account of sampling strategy                                                                                                                                                              | N/A        |
|                           |         | (e) Describe any sensitivity analyses                                                                                                                                                                                                                                                                                                                                                                                                                                  | N/A        |

| <b>Results</b>           |     |                                                                                                                                                                                                              | <b>Check list</b> |
|--------------------------|-----|--------------------------------------------------------------------------------------------------------------------------------------------------------------------------------------------------------------|-------------------|
| Participants             | 13* | (a) Report numbers of individuals at each stage of study—eg numbers potentially eligible, examined for eligibility, confirmed eligible, included in the study, completing follow-up, and analysed            | N/A               |
|                          |     | (b) Give reasons for non-participation at each stage                                                                                                                                                         | N/A               |
|                          |     | (c) Consider use of a flow diagram                                                                                                                                                                           | N/A               |
| Descriptive data         | 14* | (a) Give characteristics of study participants (eg demographic, clinical, social) and information on exposures and potential confounders                                                                     | Y p               |
|                          |     | (b) Indicate number of participants with missing data for each variable of interest                                                                                                                          | N/A               |
|                          |     | (c) <i>Cohort study</i> —Summarise follow-up time (eg, average and total amount)                                                                                                                             | N/A               |
| Outcome data             | 15* | <i>Cohort study</i> —Report numbers of outcome events or summary measures over time                                                                                                                          | N/A               |
|                          |     | <i>Case-control study</i> —Report numbers in each exposure category, or summary measures of exposure                                                                                                         | N/A               |
|                          |     | <i>Cross-sectional study</i> —Report numbers of outcome events or summary measures                                                                                                                           | Yes p9            |
| Main results             | 16  | (a) Give unadjusted estimates and, if applicable, confounder-adjusted estimates and their precision (eg, 95% confidence interval). Make clear which confounders were adjusted for and why they were included | N/A               |
|                          |     | (b) Report category boundaries when continuous variables were categorized                                                                                                                                    | N/A               |
|                          |     | (c) If relevant, consider translating estimates of relative risk into absolute risk for a meaningful time period                                                                                             | N/A               |
| Other analyses           | 17  | Report other analyses done—eg analyses of subgroups and interactions, and sensitivity analyses                                                                                                               | Yes p9-10         |
| <b>Discussion</b>        |     |                                                                                                                                                                                                              |                   |
| Key results              | 18  | Summarise key results with reference to study objectives                                                                                                                                                     | Yes p11           |
| Limitations              | 19  | Discuss limitations of the study, taking into account sources of potential bias or imprecision. Discuss both direction and magnitude of any potential bias                                                   | Yes p13           |
| Interpretation           | 20  | Give a cautious overall interpretation of results considering objectives, limitations, multiplicity of analyses, results from similar studies, and other relevant evidence                                   | Yes p11-13        |
| Generalisability         | 21  | Discuss the generalisability (external validity) of the study results                                                                                                                                        | Yes p11           |
| <b>Other information</b> |     |                                                                                                                                                                                                              |                   |
| Funding                  | 22  | Give the source of funding and the role of the funders for the present study and, if applicable, for the original study on which the present article is based                                                | Yes p15           |
